# Supplementary material for: Cationic polycyclization of ynamides: building up molecular complexity
Source: Royal Society of Chemistry journal article supplement (doi:10.1039/c7ob00850c), 2017-01-01

*Supporting Information*

**Cationic Polycyclization of Ynamides:  
Building up Molecular Complexity**

Cédric Theunissen,<sup>a</sup> Benoît Métayer,<sup>b</sup> Morgan Lecomte,<sup>a</sup> Nicolas Henry,<sup>a</sup> Hwai-Chien Chan,<sup>a</sup> Guillaume Compain,<sup>b</sup> Phidéline Gérard,<sup>a</sup> Christian Bachmann,<sup>c</sup> Naima Mokhtari,<sup>b</sup> Jérôme Marrot,<sup>d</sup> Agnès Martin-Mingot,<sup>b</sup> Sébastien Thibaudeau<sup>b,\*</sup> and Gwilherm Evano<sup>a,\*</sup>

<sup>a</sup> *Laboratoire de Chimie Organique, Service de Chimie et PhysicoChimie Organiques, Université libre de Bruxelles, Avenue F. D. Roosevelt 50, CP160/06, 1050 Brussels, Belgium.*

<sup>b</sup> *Supercid group in "Organic Synthesis" team, Université de Poitiers, CNRS UMR 7285 IC2MP, Bât. B28, 4 rue Michel Brunet, TSA 51106, 86073 Poitiers Cedex 09, France.*

<sup>c</sup> *Computational Chemistry Group in "Catalysis and Renewable Carbon" Team, Université de Poitiers, CNRS UMR 7285 IC2MP, TSA 51106, 86073 Poitiers Cedex 09, France.*

<sup>d</sup> *Institut Lavoisier de Versailles, UMR CNRS 8180, Université de Versailles Saint-Quentin en Yvelines, 45, avenue des Etats-Unis, 78035 Versailles Cedex, France.*

|                                                     |     |
|-----------------------------------------------------|-----|
| Computational Data.....                             | S2  |
| <sup>1</sup> H and <sup>13</sup> C NMR Spectra..... | S12 |

## Computational data

### Computational details:

All molecular species were fully optimized by density functional theory at the B3LYP level.<sup>1</sup> The correlation-consistent double-zeta + polarization basis sets of Dunning, cc-pVDZ,<sup>2</sup> were used for all atoms. For each structure, the analytic Hessian was calculated to obtain the vibrational frequencies (zero and one imaginary frequency for local minima and transition structures, respectively). Unscaled frequencies were used to calculate the zero-point energy corrections (ZPE). Calculations were performed using the Gaussian 09 suite of programs.<sup>3</sup>

---

<sup>1</sup> (a) Becke's three parameters hybrid method using the LYP correlation functional of Lee and al. (b) A. D. Becke, *J. Phys. Chem.* **1993**, *98*, 5648-5652. (c) C. Lee, W. Yang, R. G. Parr, *Phys. Rev. B* **1988**, *37*, 785-789.

<sup>2</sup> T. H. Dunning, *J. Chem. Phys.* **1989** *90* 1007-1023.

<sup>3</sup> Gaussian 09, Revision A.02, M. J. Frisch, G. W. Trucks, H. B. Schlegel, G. E. Scuseria, M. A. Robb, J. R. Cheeseman, G. Scalmani, V. Barone, B. Mennucci, G. A. Petersson, H. Nakatsuji, M. Caricato, X. Li, H. P. Hratchian, A. F. Izmaylov, J. Bloino, G. Zheng, J. L. Sonnenberg, M. Hada, M. Ehara, K. Toyota, R. Fukuda, J. Hasegawa, M. Ishida, T. Nakajima, Y. Honda, O. Kitao, H. Nakai, T. Vreven, J. A. Montgomery, Jr., J. E. Peralta, F. Ogliaro, M. Bearpark, J. J. Heyd, E. Brothers, K. N. Kudin, V. N. Staroverov, R. Kobayashi, J. Normand, K. Raghavachari, A. Rendell, J. C. Burant, S. S. Iyengar, J. Tomasi, M. Cossi, N. Rega, J. M. Millam, M. Klene, J. E. Knox, J. B. Cross, V. Bakken, C. Adamo, J. Jaramillo, R. Gomperts, R. E. Stratmann, O. Yazyev, A. J. Austin, R. Cammi, C. Pomelli, J. W. Ochterski, R. L. Martin, K. Morokuma, V. G. Zakrzewski, G. A. Voth, P. Salvador, J. J. Dannenberg, S. Dapprich, A. D. Daniels, O. Farkas, J. B. Foresman, J. V. Ortiz, J. Cioslowski, and D. J. Fox, Gaussian, Inc., Wallingford CT, 2009.

Calculated total electronic energies ( $E_e$ )<sup>a</sup>, zero-point corrected energies ( $E_{ZPE}$ ) and relative zero-point corrected energies ( $\Delta E_{ZPE}$ )<sup>b</sup> for gas phase compounds at the B3LYP/cc-pVDZ level:

| Compound                                   | $E_e$      | $E_{ZPE}$  | $\Delta E_{ZPE}$         |
|--------------------------------------------|------------|------------|--------------------------|
| ynamide <b>11<sub>x</sub></b>              | -900.15685 | -899.87170 |                          |
| H <sub>7</sub> F <sub>6</sub> <sup>+</sup> | -603.01991 | -602.94130 |                          |
| (HF) <sub>6</sub>                          | -602.74012 | -602.66689 |                          |
| keteniminium ( <b>II<sub>x</sub></b> )     | -900.52454 | -900.22767 | 0.0 (-51.2) <sup>c</sup> |
| <b>TS(II<sub>x</sub>-IV<sub>x</sub>)</b>   | -900.50738 | -900.21337 | 9.0                      |
| <b>IV<sub>x</sub></b>                      | -900.54334 | -900.24456 | -10.6                    |
| <b>TS(IV<sub>x</sub>-V<sub>x</sub>)</b>    | -900.52498 | -900.22728 | +0.2                     |
| <b>V<sub>x</sub></b>                       | -900.55147 | -900.25149 | -15.0                    |
| <b>TS(V<sub>x</sub>-σ complex)</b>         | -900.53423 | -900.23367 | -3.8                     |
| <b>σ complex</b>                           | -900.53889 | -900.23709 | -5.9                     |
| polycyclic product <b>12<sub>x</sub></b>   | -900.22747 | -899.93607 | (+16.7) <sup>d</sup>     |

<sup>a</sup> in atomic units (a.u.).

<sup>b</sup> in kcal mol<sup>-1</sup> (1 a.u. = 627.51 kcal mol<sup>-1</sup>).

<sup>c</sup> relative ZPE corrected energy of [**II<sub>x</sub>** + (HF)<sub>6</sub>] with respect to [**11<sub>x</sub>** + H<sub>7</sub>F<sub>6</sub><sup>+</sup>].

<sup>d</sup> relative ZPE corrected energy of [**12<sub>x</sub>** + H<sub>7</sub>F<sub>6</sub><sup>+</sup>] with respect to [σ complex + (HF)<sub>6</sub>].

### B3LYP/cc-pVDZ Cartesian coordinates:

Symbol, 0, x, y, z

#### ynamide **11<sub>x</sub>**

Charge = 0 Multiplicity = 1

C, 0, -0.3583660194, -0.9302006297, -0.8447802368  
 C, 0, 0.8469439757, -0.8821372837, -0.6798869485  
 C, 0, -1.7641670195, -0.9693243111, -1.0953002481  
 N, 0, 2.1772260513, -0.8111884333, -0.4910495375  
 C, 0, 2.8932269401, -1.4295742027, 0.6402118834  
 C, 0, 3.0504039654, -0.2807705084, -1.4513110693  
 C, 0, -2.2900449417, -0.3290147224, -2.2489542664  
 C, 0, -3.6715270751, -0.3914759665, -2.4653901335  
 C, 0, -4.5256456566, -1.0579467364, -1.5813901567  
 C, 0, -4.0001834144, -1.6844000048, -0.448092352  
 C, 0, -2.6278876259, -1.6411981764, -0.2074960969  
 C, 0, -1.3777346404, 0.3982106915, -3.2023449609  
 C, 0, 2.830571525, -2.9464444858, 0.6421123616  
 C, 0, 4.2998729011, -0.8248718847, 0.3997403014  
 O, 0, 2.7638108911, 0.1914908792, -2.5157579611  
 O, 0, 4.3230642651, -0.4026516672, -0.9734353207

C, 0, 3.3501292373, -3.6942106026, -0.4275173711  
C, 0, 3.2881653278, -5.0879570798, -0.4104075065  
C, 0, 2.7071434045, -5.753991663, 0.6749495265  
C, 0, 2.1884959232, -5.0181009311, 1.7421580528  
C, 0, 2.2494668198, -3.6207583702, 1.7226828737  
H, 0, 2.4710733684, -1.0531383039, 1.5836842468  
H, 0, -4.0863331132, 0.0965632355, -3.3513492729  
H, 0, -5.5993952425, -1.0877504802, -1.7796967194  
H, 0, -4.6578136921, -2.2091499464, 0.2484091613  
H, 0, -2.2052278249, -2.130135863, 0.6722789862  
H, 0, -0.567598329, -0.2548437808, -3.5653937338  
H, 0, -0.8787456449, 1.2483396752, -2.7072752555  
H, 0, -1.9335734688, 0.7826100714, -4.069724275  
H, 0, 4.4746461878, 0.054736975, 1.0398830441  
H, 0, 5.1048251154, -1.5547715895, 0.5507558543  
H, 0, 3.8052390634, -3.1860159305, -1.2813762526  
H, 0, 3.6939899765, -5.6582481695, -1.2488894752  
H, 0, 2.6585341584, -6.8450922804, 0.6855763351  
H, 0, 1.7308592059, -5.5300833787, 2.5915631664  
H, 0, 1.8378064052, -3.0475891449, 2.5579303566

### **H<sub>7</sub>F<sub>6</sub><sup>+</sup>**

Charge = 1 Multiplicity = 1

F, 0, 2.6144545605, 1.6050706569, 0.1858396246  
F, 0, 0.2092511436, 2.1213923214, -0.5901471295  
F, 0, -1.4486590107, 0.8542190195, 0.5636318628  
F, 0, -2.0841411591, -1.0821155287, -0.5006373269  
F, 0, -0.3347051031, -2.5626958393, 0.0302811018  
F, 0, 1.1189864405, -0.5403780568, 0.305236639  
H, 0, 1.1194892964, 2.0339591385, -0.3165430979  
H, 0, -0.7453259619, 1.3958860486, 0.0875526231  
H, 0, -1.8076087697, -0.1217224075, -0.0013209667  
H, 0, -1.3714372635, -1.7968747654, -0.288859758  
H, 0, 0.4163474335, -1.987631482, 0.1830171985  
H, 0, 2.020939203, -0.3034249866, 0.4236549233  
H, 0, 3.3650885383, 2.1697520506, 0.2176651503

### **(HF)<sub>6</sub>**

Charge = 0 Multiplicity = 1

F, 0, 1.9320615572, 1.0925916262, 0.4880823307  
F, 0, 0.0198186744, 2.2195102033, -0.4880823307  
F, 0, -1.9122428828, 1.1269185772, 0.4880823307  
F, 0, -1.9320615572, -1.0925916262, -0.4880823307  
F, 0, -0.0198186744, -2.2195102033, 0.4880823307  
F, 0, 1.9122428828, -1.1269185772, -0.4880823307  
H, 0, 1.1908663467, 1.6078683396, 0.1074674923  
H, 0, -0.7970216547, 1.8352546785, -0.1074674923  
H, 0, -1.9878880014, 0.2273863389, 0.1074674923  
H, 0, -1.1908663467, -1.6078683396, -0.1074674923  
H, 0, 0.7970216547, -1.8352546785, 0.1074674923  
H, 0, 1.9878880014, -0.2273863389, -0.1074674923

### keteniminium II<sub>x</sub>

Charge = 1 Multiplicity = 1

C,0,2.1114655436,-0.6700705641,0.2108138167  
N,0,0.7596207083,-0.9066411831,0.8604279386  
C,0,0.9715285139,-1.6591345977,2.1551227004  
O,0,2.2402946473,-2.0323539609,2.1715965765  
C,0,2.9157650673,-1.779729066,0.910059435  
C,0,-0.3753614838,-0.5145553405,0.4812643511  
C,0,-1.5943294115,-0.2612620644,0.067277944  
C,0,-2.4930051522,0.8636133146,0.294662056  
C,0,-2.1736633903,1.9313759003,1.1740115949  
C,0,-3.113437153,2.9554660163,1.3228010857  
C,0,-4.3297896494,2.9372329841,0.6324684195  
C,0,-4.6392991973,1.8798844312,-0.2287848887  
C,0,-3.7242355465,0.8462558205,-0.3942330815  
C,0,-0.8765670125,1.9577475545,1.9334678893  
O,0,0.1201947795,-1.815047592,2.9630412108  
C,0,2.0929707912,-0.6860657092,-1.2925020217  
C,0,2.4685576926,0.4684601318,-1.9945124956  
C,0,2.4741349491,0.4733486178,-3.3918357502  
C,0,2.0954749584,-0.6723098106,-4.0956827997  
C,0,1.7127906416,-1.826185295,-3.4016989526  
C,0,1.7141406349,-1.8369025944,-2.0065791826  
H,0,2.4382441221,0.3138476731,0.579589396  
H,0,3.9414088228,-1.4729913721,1.1428244265  
H,0,2.9270746257,-2.7174575373,0.3376816488  
H,0,-1.9689537669,-1.070596494,-0.5790654984  
H,0,-2.8900858569,3.7847581976,1.9970817698  
H,0,-5.0412444057,3.7533710944,0.772842062  
H,0,-5.5893695895,1.8610842862,-0.7646294898  
H,0,-3.9568795168,0.0134193636,-1.0617512366  
H,0,-0.0098369636,1.9997831542,1.2480701258  
H,0,-0.7684619399,1.0646750748,2.5745607936  
H,0,-0.8124412936,2.838740282,2.5861841503  
H,0,2.7669343336,1.3670867839,-1.4484307991  
H,0,2.7755866029,1.3741011515,-3.9293946111  
H,0,2.1005457404,-0.6695782494,-5.1873380801  
H,0,1.4197870913,-2.7233652099,-3.9500920229  
H,0,1.4173020626,-2.7491331918,-1.4817054808

### TS(II<sub>x</sub>-IV<sub>x</sub>)

Charge = 1 Multiplicity = 1

C,0,3.5852009609,0.5963665867,-0.4136010005  
N,0,2.3414516295,0.3742263851,0.3978035136  
C,0,2.6786717324,-0.2821812323,1.6487531187  
O,0,3.9553583606,-0.6598560533,1.5847681964  
C,0,4.497428906,-0.4533042995,0.2583014423  
C,0,1.140663295,0.880938813,0.2226456036  
C,0,0.3289857328,1.2482028526,-0.799407712  
C,0,-0.6746932221,2.2632604129,-0.6480152809  
C,0,-0.7162293079,2.9363903578,0.6098613903

C, 0, -1.8426156334, 3.7108179425, 0.9372745531  
C, 0, -2.8336275229, 3.9200789937, -0.0165836652  
C, 0, -2.7522888824, 3.3187646826, -1.2888510485  
C, 0, -1.6915013648, 2.4831335316, -1.6030482074  
C, 0, 0.4077132962, 2.7094389417, 1.5112016615  
O, 0, 1.9258331772, -0.3919711603, 2.5688152815  
C, 0, 3.4011188804, 0.4461028345, -1.9019040683  
C, 0, 3.7517445098, 1.5058336582, -2.7507609073  
C, 0, 3.618774473, 1.3765409278, -4.1366279147  
C, 0, 3.1240493026, 0.1901679541, -4.6831101063  
C, 0, 2.7640551863, -0.870282962, -3.842148826  
C, 0, 2.905124634, -0.7467964794, -2.4592264237  
H, 0, 3.9475264274, 1.6107105178, -0.1832622276  
H, 0, 5.5310290251, -0.1059740659, 0.3679359673  
H, 0, 4.4831303997, -1.4152222615, -0.2736090356  
H, 0, 0.3729432106, 0.6447339345, -1.7118353955  
H, 0, -1.9072119332, 4.1920147304, 1.9146972549  
H, 0, -3.682204671, 4.5640862479, 0.2217463698  
H, 0, -3.5450828218, 3.4900637537, -2.0189579682  
H, 0, -1.6497199595, 1.9754667834, -2.5685427471  
H, 0, 1.3630261326, 3.1654920182, 1.2226605035  
H, 0, 0.6562392896, 1.4474571297, 1.3512090052  
H, 0, 0.2259295925, 2.7741613502, 2.5923123244  
H, 0, 4.1418155334, 2.4357060102, -2.3285842422  
H, 0, 3.9044395428, 2.2044116231, -4.7881828827  
H, 0, 3.0216930602, 0.0870505475, -5.7651477234  
H, 0, 2.3811376018, -1.8002644549, -4.2668795046  
H, 0, 2.6255174268, -1.5859125523, -1.8163792984

#### IV<sub>x</sub>

Charge = 1 Multiplicity = 1

C, 0, 2.2264461734, -0.5304409951, 0.094413602  
N, 0, 1.1142983049, -0.6739767735, 1.0557310676  
C, 0, 1.5068740507, -1.4628600221, 2.1960042821  
O, 0, 2.7547831411, -1.8934065899, 2.0002889542  
C, 0, 3.2222483698, -1.5723328221, 0.6732804067  
C, 0, -0.0649559568, -0.0304499263, 1.097757946  
C, 0, -0.5857163996, 0.8051144629, 0.1220266899  
C, 0, -1.8220565295, 1.4834904969, 0.2531072142  
C, 0, -2.4517109121, 1.7815945621, 1.5506095447  
C, 0, -3.8680958251, 2.1074410084, 1.5797610728  
C, 0, -4.5408652535, 2.3634771379, 0.420854851  
C, 0, -3.8517416817, 2.2785206882, -0.8302150425  
C, 0, -2.5371140088, 1.8683714311, -0.9128125958  
C, 0, -1.7134413367, 1.9673463825, 2.6854320029  
O, 0, 0.8196686342, -1.6572485332, 3.1558923928  
C, 0, 1.8700841003, -0.7788030476, -1.3587334782  
C, 0, 2.3237246475, 0.1123748148, -2.3410113027  
C, 0, 2.0556675848, -0.1291009619, -3.6925820105  
C, 0, 1.3254715176, -1.2587239651, -4.0693225448  
C, 0, 0.8663513078, -2.1500884348, -3.0924088502

C,0,1.1401858096,-1.9152256883,-1.744058168  
H,0,2.6344731096,0.488130899,0.1993129114  
H,0,4.2428618831,-1.1805873463,0.7583591982  
H,0,3.2293204241,-2.4976989833,0.0807783602  
H,0,-0.0908903432,0.8522947582,-0.8498130692  
H,0,-4.3515956935,2.2247225805,2.551655913  
H,0,-5.5913058527,2.6570133321,0.438723151  
H,0,-4.3961209944,2.5091350136,-1.7489550981  
H,0,-2.0627019804,1.746785377,-1.8883213773  
H,0,-0.6231897724,1.9830525282,2.6738386037  
H,0,-0.6322358709,-0.2809368246,1.999470342  
H,0,-2.2038559778,2.1866734142,3.6373720255  
H,0,2.8975437953,0.9972164794,-2.0520416745  
H,0,2.4213290737,0.5667347458,-4.4502110347  
H,0,1.116498049,-1.4488691927,-5.1238842508  
H,0,0.2978210156,-3.0357132522,-3.3830420604  
H,0,0.7794173969,-2.6220587541,-0.9919819742

### TS(IV<sub>x</sub>-V<sub>x</sub>)

Charge = 1 Multiplicity = 1

C,0,-0.7351672763,0.8535355789,0.1325368513  
C,0,0.4450013161,0.8424615931,0.93507004  
N,0,1.5418947268,0.0682797582,0.702501859  
C,0,-1.5326766685,2.0012159197,0.1999102529  
C,0,2.1053609123,-0.3772567015,-0.5902490505  
C,0,-0.8510714108,3.1033646013,0.838995985  
C,0,-1.6138812474,4.1574854818,1.3944942957  
C,0,-2.9677043242,4.2044080593,1.1141365996  
C,0,-3.6122405505,3.1949336955,0.3384978956  
C,0,-2.9158281975,2.1014536179,-0.1250328008  
C,0,0.5625765068,2.9727023197,0.859148711  
C,0,2.524200308,-0.0056652584,1.7377691533  
C,0,3.3661505383,-1.1182925571,-0.0765929939  
O,0,3.6124874329,-0.6141539031,1.2537002665  
O,0,2.3819607125,0.4415871276,2.8414741182  
C,0,1.1913590771,-1.2341319498,-1.4410793673  
C,0,0.5522467825,-2.3660734289,-0.905800796  
C,0,-0.2662756953,-3.1584146343,-1.7125270588  
C,0,-0.4473833445,-2.8357432704,-3.0632646571  
C,0,0.1898180934,-1.7160711604,-3.6027648572  
C,0,1.0028452134,-0.9157647098,-2.7930304232  
H,0,-0.9860535325,-0.0023658367,-0.4983762218  
H,0,0.3649180828,1.0851833799,2.0029117455  
H,0,2.4016211099,0.5173474077,-1.1659022975  
H,0,-1.126455811,4.9634907243,1.9453436783  
H,0,-3.5591813999,5.0509995588,1.4690505262  
H,0,-4.6822945806,3.2832933471,0.1422652863  
H,0,-3.4155256689,1.2960090606,-0.6659424243  
H,0,1.0864783837,2.8079384703,-0.0833316051  
H,0,1.1568400476,3.4636743022,1.6371020892  
H,0,4.2545205208,-0.9197109488,-0.6874597422

H,0,3.1980238627,-2.2026435706,-0.0091328218  
H,0,0.6874501146,-2.6294311385,0.1467024375  
H,0,-0.7594574102,-4.0353262785,-1.2883628841  
H,0,-1.0824033194,-3.4612342504,-3.6936706245  
H,0,0.0568565105,-1.4629136844,-4.6563446086  
H,0,1.4996951847,-0.0409437224,-3.2213395561

### V<sub>x</sub>

Charge = 1 Multiplicity = 1

C,0,-0.7613723179,0.4426093348,0.928048253  
C,0,0.5992114409,0.8983887359,1.3214439668  
N,0,1.6668076093,0.0120516639,0.9585983089  
C,0,-1.5651769213,1.505598742,0.5402362953  
C,0,2.1422916437,-0.2268997045,-0.4092628844  
C,0,-0.7810100284,2.71416499,0.5712229412  
C,0,-1.40326051,3.9380182472,0.358096965  
C,0,-2.7736769312,3.9409977795,0.0646959298  
C,0,-3.5469751943,2.7530759863,-0.0022717408  
C,0,-2.9587480693,1.5281946379,0.2344836616  
C,0,0.6510532045,2.3915494676,0.8611844174  
C,0,2.6943538812,-0.1792401078,1.8914884327  
C,0,3.3753741162,-1.1065326618,-0.0812222969  
O,0,3.7329341647,-0.7811890963,1.2784598081  
O,0,2.6508508612,0.1449724764,3.0511536612  
C,0,1.1158324518,-0.8680947765,-1.3202978885  
C,0,0.4505654408,-2.0521109181,-0.9447321289  
C,0,-0.4723487481,-2.6492103037,-1.8055815028  
C,0,-0.7407471144,-2.0757464838,-3.0541008595  
C,0,-0.0837099593,-0.9024196242,-3.4367985643  
C,0,0.8377781646,-0.302291077,-2.5737466415  
H,0,-1.0810126968,-0.5985049945,1.0057144949  
H,0,0.6251307292,0.8876374433,2.438450115  
H,0,2.4772382915,0.7220629297,-0.8693624912  
H,0,-0.8455528378,4.8750268073,0.3972564746  
H,0,-3.2692196706,4.8962719706,-0.126102567  
H,0,-4.6107221684,2.8216846921,-0.2339395106  
H,0,-3.5342653026,0.6013539456,0.2045347591  
H,0,1.2472556356,2.471252776,-0.0642514861  
H,0,1.1113173886,3.0644212992,1.5993006235  
H,0,4.2364981898,-0.8928169303,-0.7255062247  
H,0,3.1334870233,-2.1788744496,-0.1325510476  
H,0,0.6655698915,-2.5146300422,0.0220888555  
H,0,-0.9742647794,-3.5722041017,-1.5078605023  
H,0,-1.455403336,-2.5484560894,-3.7308123748  
H,0,-0.2838334237,-0.456021894,-4.4128818042  
H,0,1.3564528812,0.6091343302,-2.8837704476

### TS(V<sub>x</sub>-σ complex)

Charge = 1 Multiplicity = 1

C,0,-0.3928424769,-0.2622661676,0.8853277094  
C,0,0.7919742757,0.2460283335,1.7276190597



N,0,1.9796832186,-0.5502712976,1.626833589  
C,0,-1.2640981159,0.9075012644,0.7200825989  
C,0,2.5483759802,-1.0076436847,0.3647504462  
C,0,-0.5376877018,2.0879575186,1.0107588539  
C,0,-1.1771603579,3.3259870764,0.9690972655  
C,0,-2.5331727456,3.373861136,0.6259492213  
C,0,-3.2558647956,2.2011049931,0.3407204106  
C,0,-2.6272544495,0.959082567,0.3836301721  
C,0,0.8840768038,1.7562571523,1.3836929515  
C,0,2.8438463044,-0.7574679136,2.6975120174  
C,0,3.7010435773,-1.8925606354,0.893654219  
O,0,3.9190315779,-1.4624123398,2.2442900519  
O,0,2.6857612465,-0.3833778613,3.8266534681  
C,0,1.4205696266,-1.637407789,-0.4197606895  
C,0,1.2745738846,-2.9916569903,-0.6807350182  
C,0,0.1410285732,-3.4574436962,-1.3682691928  
C,0,-0.8744243942,-2.584853205,-1.8067114674  
C,0,-0.7580021037,-1.2348249491,-1.547435334  
C,0,0.3514556065,-0.7244744103,-0.7801607595  
H,0,-0.8369671073,-1.218527433,1.1772374054  
H,0,0.4647198557,0.1594633307,2.7787745667  
H,0,2.9495450613,-0.159937774,-0.2268964987  
H,0,-0.6362089905,4.2436354628,1.20833977  
H,0,-3.0438652756,4.3383280407,0.5887213044  
H,0,-4.3169664489,2.2673301001,0.0946706806  
H,0,-3.1910074329,0.0459956368,0.1785500742  
H,0,1.5731807081,1.929070126,0.5350179465  
H,0,1.2701756466,2.3442925303,2.2284518823  
H,0,4.6315825565,-1.75627761,0.3295134032  
H,0,3.4414738501,-2.9620242509,0.9128096076  
H,0,2.0383572271,-3.7084758399,-0.3792506507  
H,0,0.0511679727,-4.5269985798,-1.5741889493  
H,0,-1.7292506925,-2.976391952,-2.3599538688  
H,0,-1.5228461622,-0.5346153774,-1.8893932544  
H,0,0.6725006977,0.291517488,-1.0354019923

### $\sigma$ complex

Charge = 1 Multiplicity = 1

C,0,-0.840176848,-0.0007383209,0.1631022956  
C,0,0.3534619338,0.5486500568,1.0007893879  
N,0,1.5847856057,-0.1918654379,0.8979556569  
C,0,-1.7341362561,1.1778854915,0.0198137926  
C,0,2.10416782,-0.6384896081,-0.4016892125  
C,0,-1.008015076,2.362459632,0.2753814359  
C,0,-1.6489070393,3.5996876805,0.2232741606  
C,0,-3.0127238802,3.6429306917,-0.0880978412  
C,0,-3.7374475591,2.4646809029,-0.3307649845  
C,0,-3.103143547,1.2230027878,-0.2788559863  
C,0,0.4239008882,2.0469089314,0.6322391566  
C,0,1.9154823706,-1.1476149033,1.8769779687  
C,0,3.2885355932,-1.4857938497,0.0806145662

O,0,2.8850433865,-1.9634461912,1.3738226466  
O,0,1.4363330626,-1.2433626117,2.9715530107  
C,0,0.9487321938,-1.3483965798,-1.0698295288  
C,0,0.8385437469,-2.7229474783,-1.2141912967  
C,0,-0.3117329121,-3.2760147393,-1.8019306932  
C,0,-1.3855599748,-2.4763010773,-2.2505493883  
C,0,-1.322131775,-1.1132793838,-2.0777920152  
C,0,-0.1988274635,-0.4944395301,-1.3870748374  
H,0,-1.2919318556,-0.9154670839,0.5645538789  
H,0,0.0412353571,0.447059038,2.0533481525  
H,0,2.4366817861,0.2121702571,-1.017772539  
H,0,-1.1025743407,4.5212906775,0.4344165705  
H,0,-3.5252910401,4.606107852,-0.1295141889  
H,0,-4.8048811618,2.5217162597,-0.5506818856  
H,0,-3.6735573174,0.3065685936,-0.4488292969  
H,0,1.0997893155,2.2197449809,-0.2271423465  
H,0,0.8135503913,2.6528123776,1.4626850883  
H,0,4.1868369718,-0.8589460945,0.1871820414  
H,0,3.5250271788,-2.3459251511,-0.5573056344  
H,0,1.6434305254,-3.3881567928,-0.9005730004  
H,0,-0.3688049467,-4.3605508753,-1.9271367043  
H,0,-2.2463396976,-2.941425834,-2.7329926392  
H,0,-2.140830898,-0.4695302309,-2.4060991813  
H,0,0.0859684619,0.4835715628,-1.7992606095

**polycyclic product 12x**

Charge = 0 Multiplicity = 1

C,0,-0.3657601596,-0.2724236333,1.2663431312  
C,0,0.8899822875,0.4427871669,1.8489045817  
N,0,2.0831005604,-0.3782302112,1.8114218799  
C,0,-1.2325177084,0.918163588,0.8774355135  
C,0,2.482655996,-1.0090512265,0.5637820897  
C,0,-0.4483145147,2.0786693936,0.7555837919  
C,0,-1.0343478728,3.2966512191,0.409216126  
C,0,-2.4163291693,3.3528280901,0.1918694048  
C,0,-3.202125866,2.2038381244,0.3353206533  
C,0,-2.6142185421,0.9815026079,0.6839149295  
C,0,0.9977709141,1.7775164555,1.0729279154  
C,0,2.3917236563,-1.1787197356,2.9015016402  
C,0,3.5032188146,-2.0486990425,1.0972352248  
O,0,3.2300211112,-2.1799801756,2.4981266072  
O,0,2.0142998731,-1.0457511219,4.0392117762  
C,0,1.2993558407,-1.5687991763,-0.2158568647  
C,0,1.549194773,-2.4190593803,-1.3057972591  
C,0,0.5083771484,-2.9503335805,-2.0633319493  
C,0,-0.8111154381,-2.6237012893,-1.7350559232  
C,0,-1.065439663,-1.7624104089,-0.669956711  
C,0,-0.0263256579,-1.2111995875,0.0998623033  
H,0,-0.8516966524,-0.8761568884,2.0512822277  
H,0,0.7057080505,0.6555071517,2.9101031966  
H,0,3.0111632747,-0.283895231,-0.0808468286

H, 0, -0.4258476955, 4.2003585536, 0.3202754823  
H, 0, -2.8862533657, 4.3022884942, -0.0748602134  
H, 0, -4.2826994822, 2.2622389019, 0.1859451574  
H, 0, -3.2401685289, 0.0961503619, 0.8196125737  
H, 0, 1.5810630623, 1.6496399468, 0.1429885302  
H, 0, 1.4943854307, 2.5633133409, 1.6615050102  
H, 0, 4.5390976489, -1.6948632009, 0.9722050141  
H, 0, 3.3965526398, -3.0362382192, 0.6290967851  
H, 0, 2.5819314675, -2.6683616016, -1.5664874964  
H, 0, 0.723633361, -3.6154378897, -2.9023625539  
H, 0, -1.6417196002, -3.0349266172, -2.3129320564  
H, 0, -2.0982814798, -1.5034478624, -0.4319882772

*Supporting Information*

**$^1\text{H}$  and  $^{13}\text{C}$  NMR spectra**

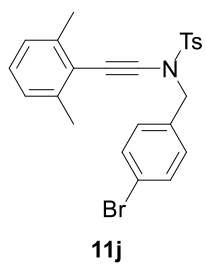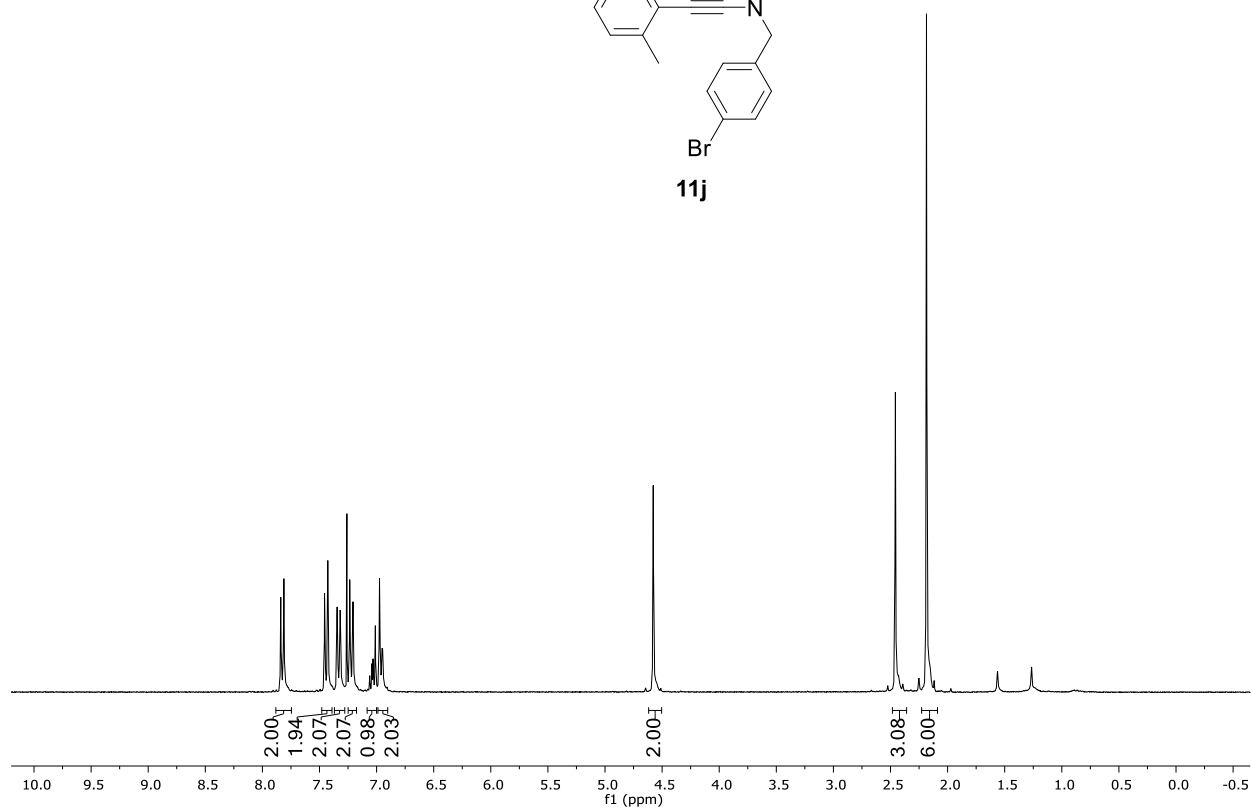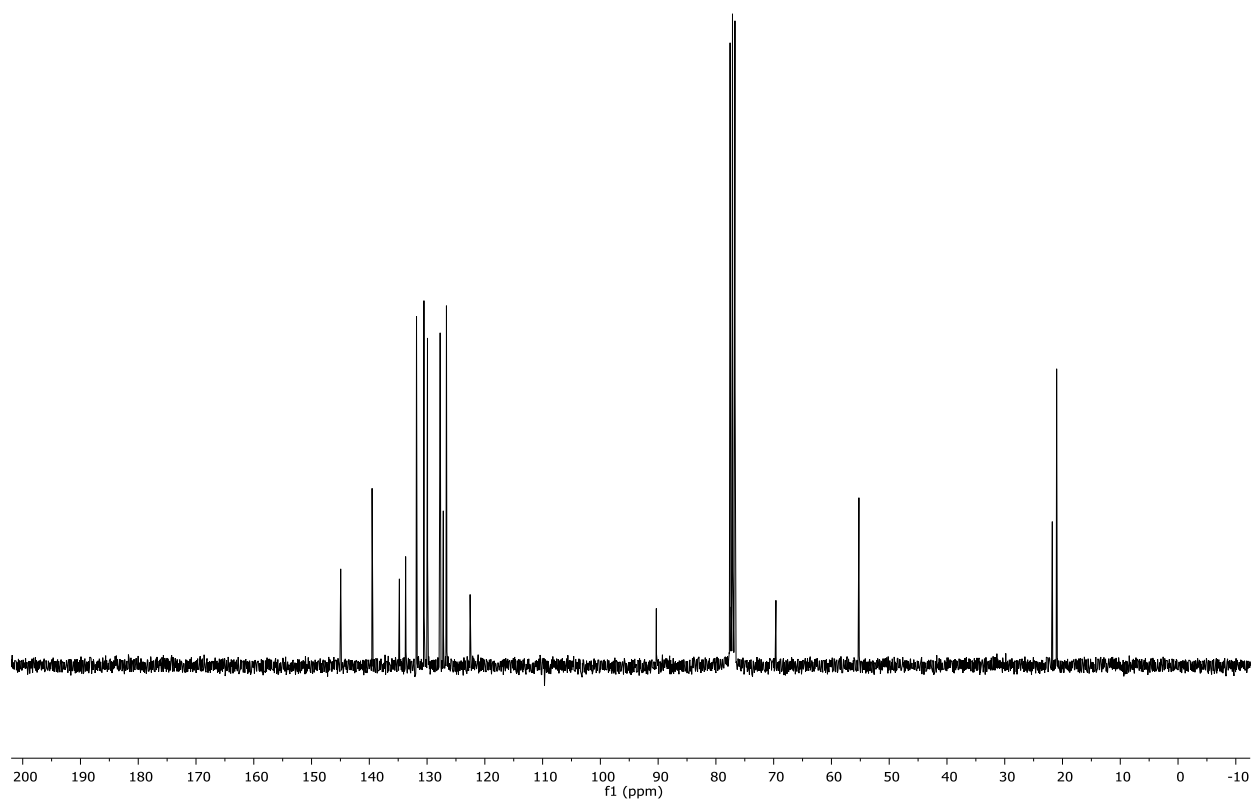

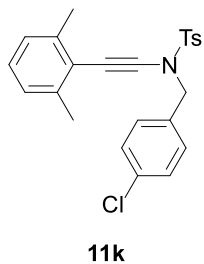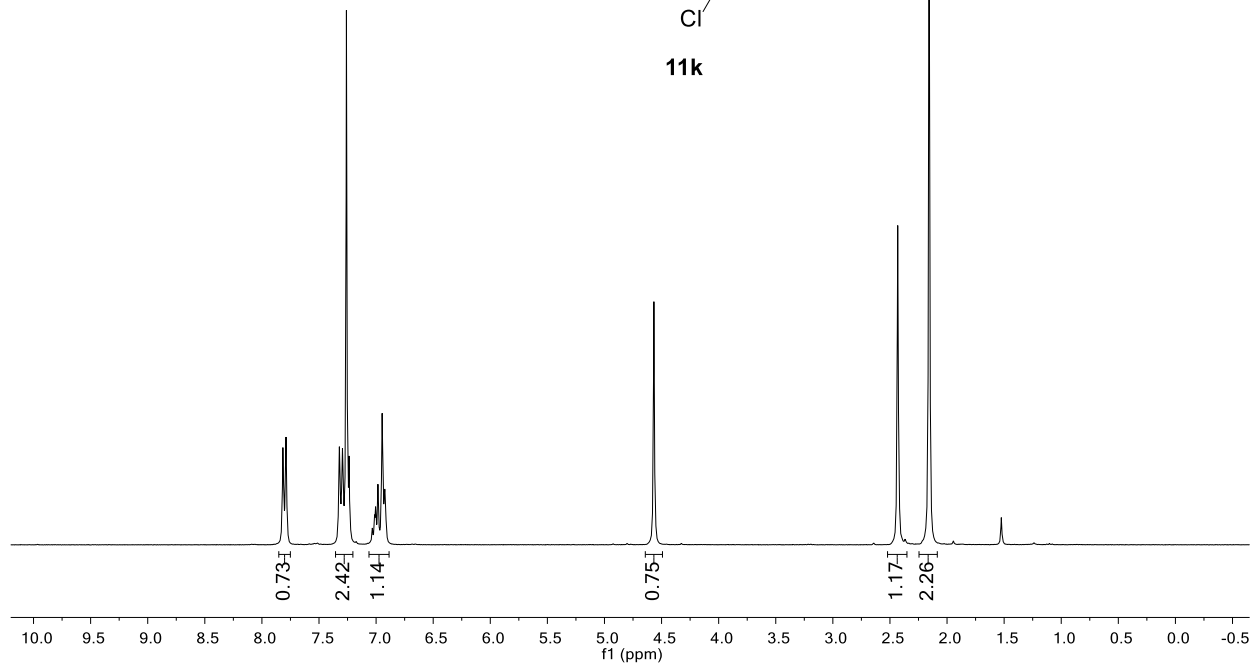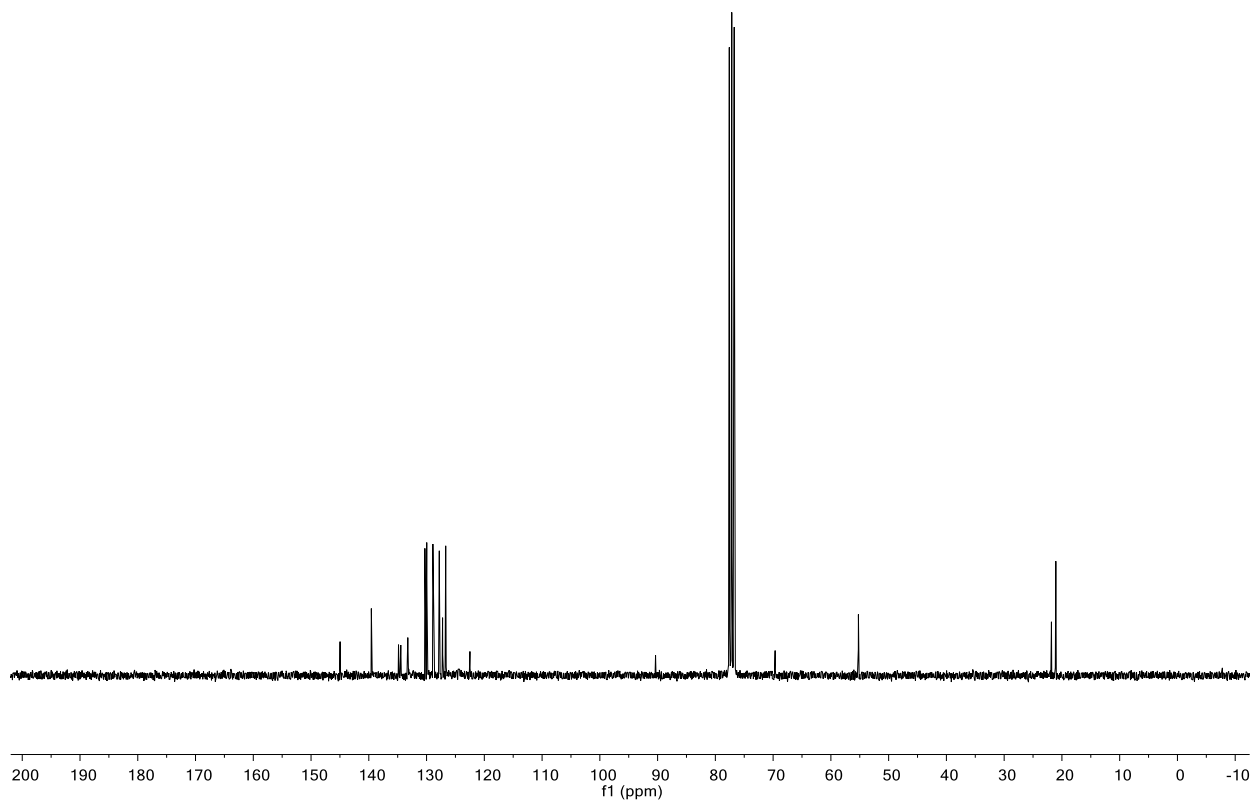

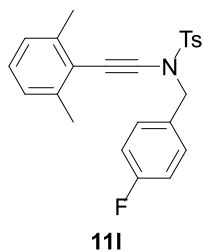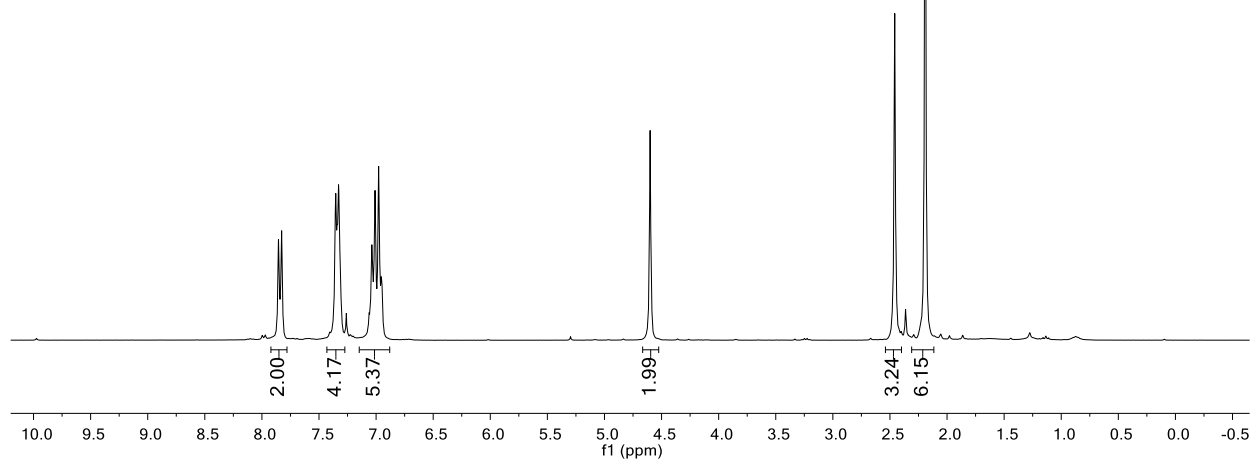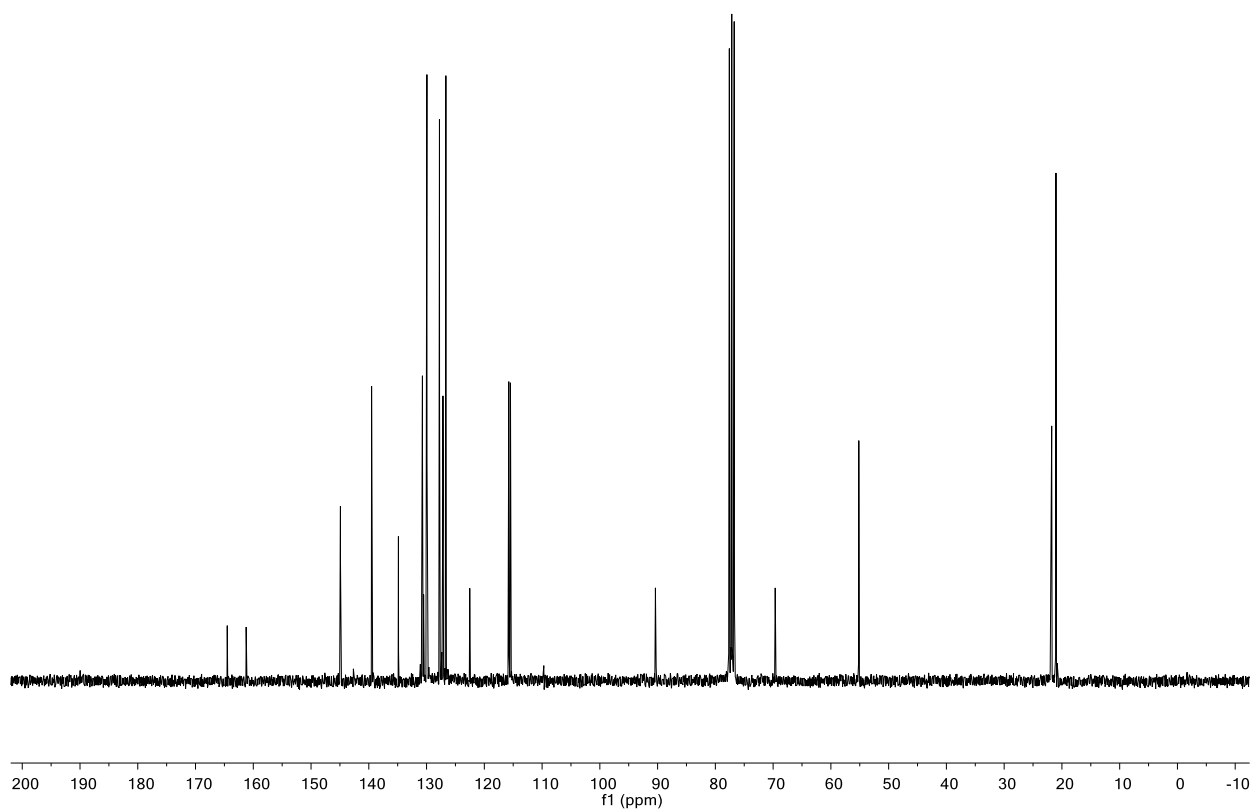

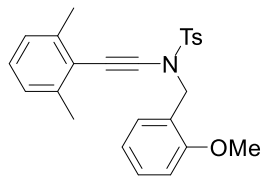

**11m**

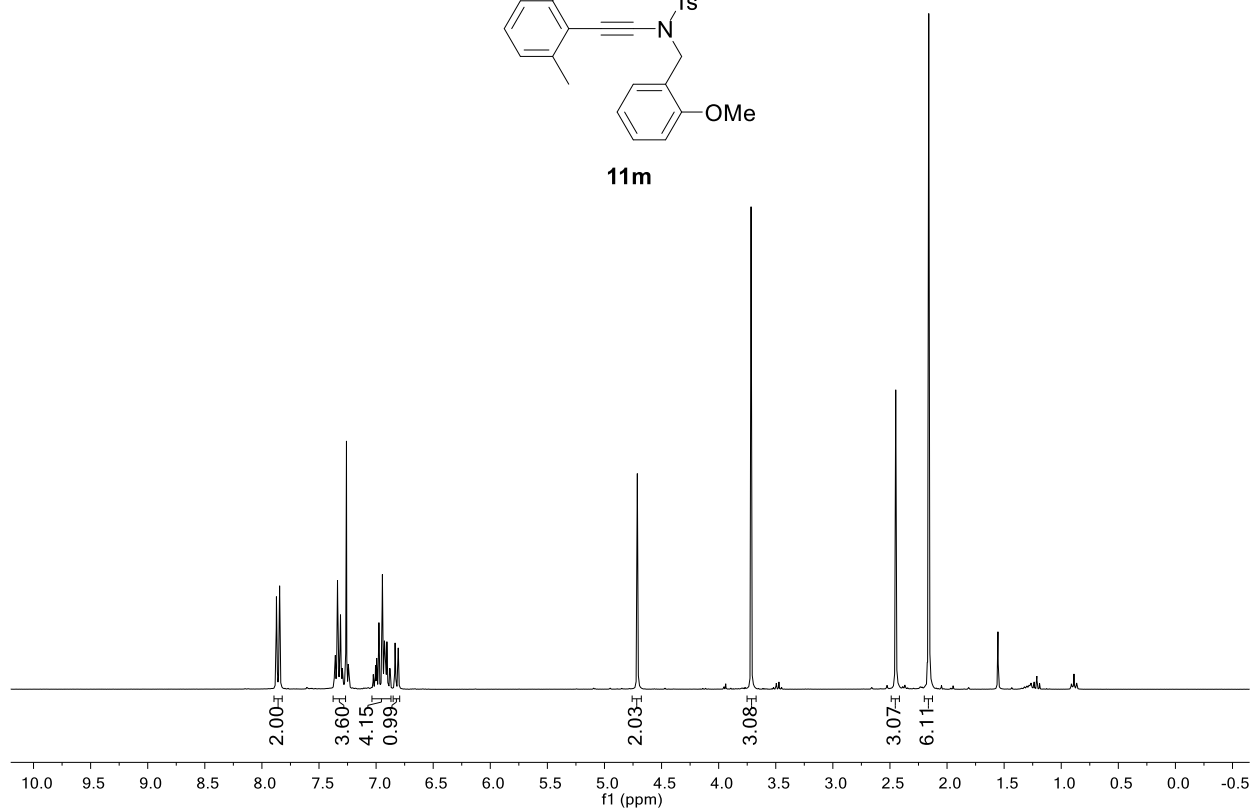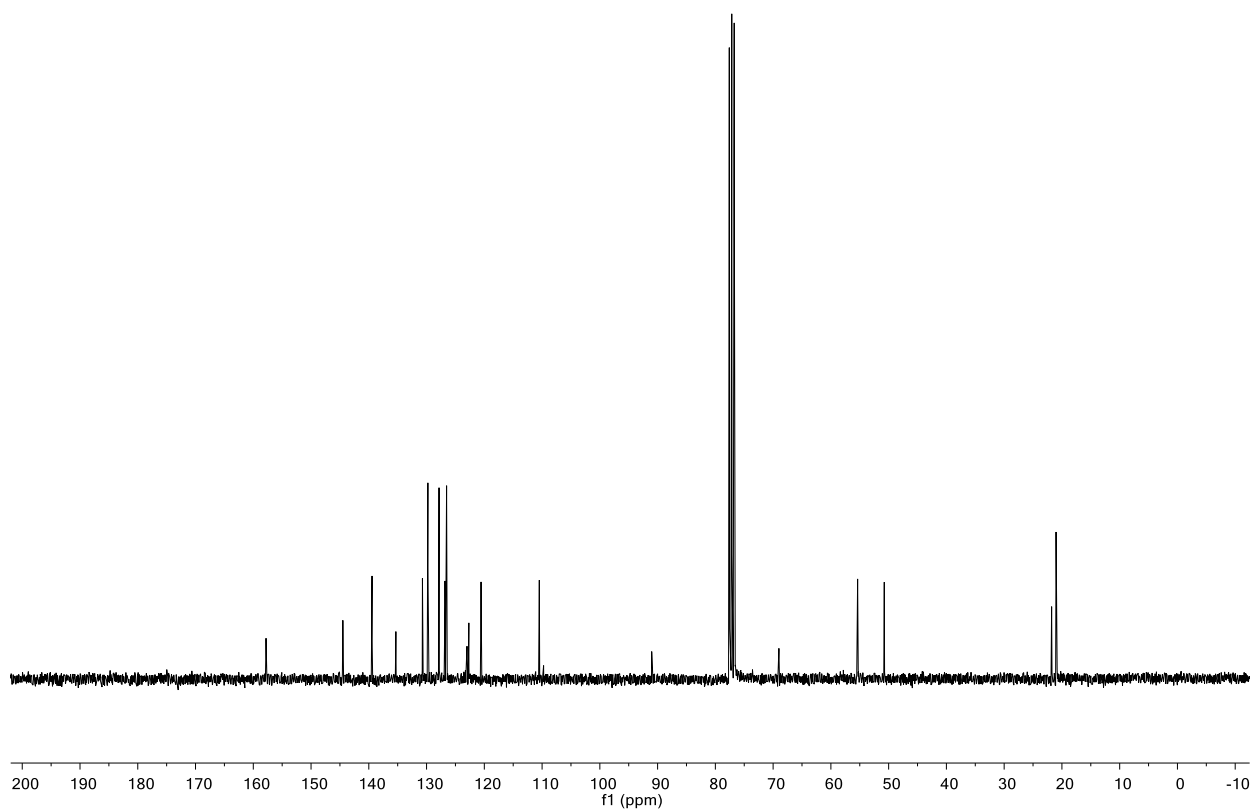



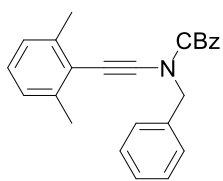

11p

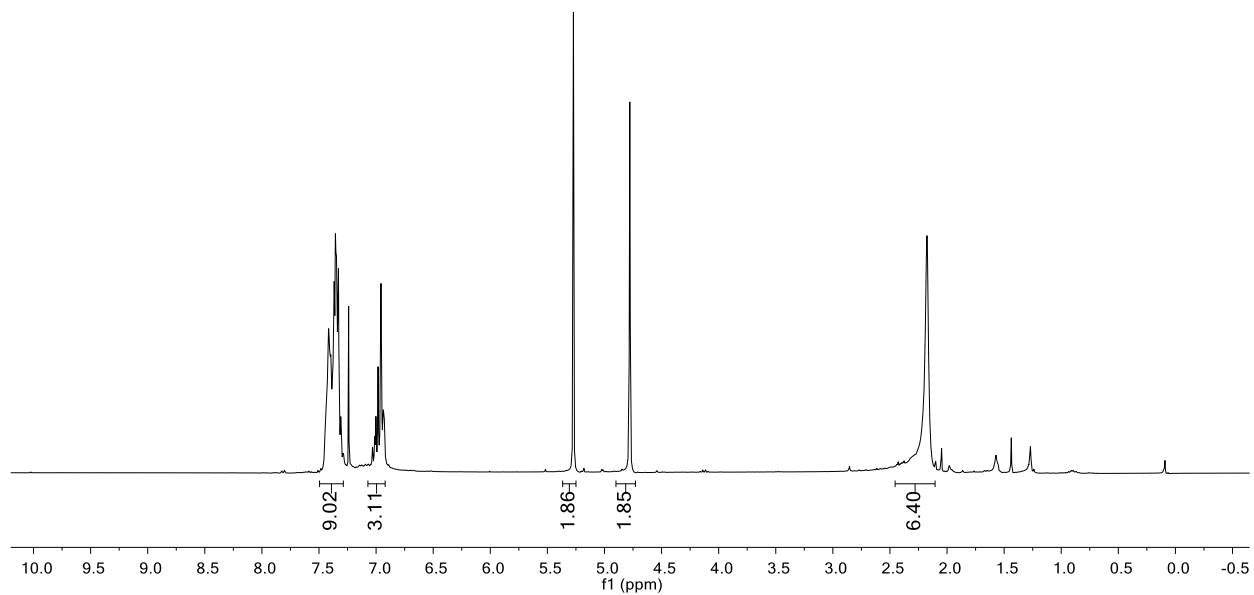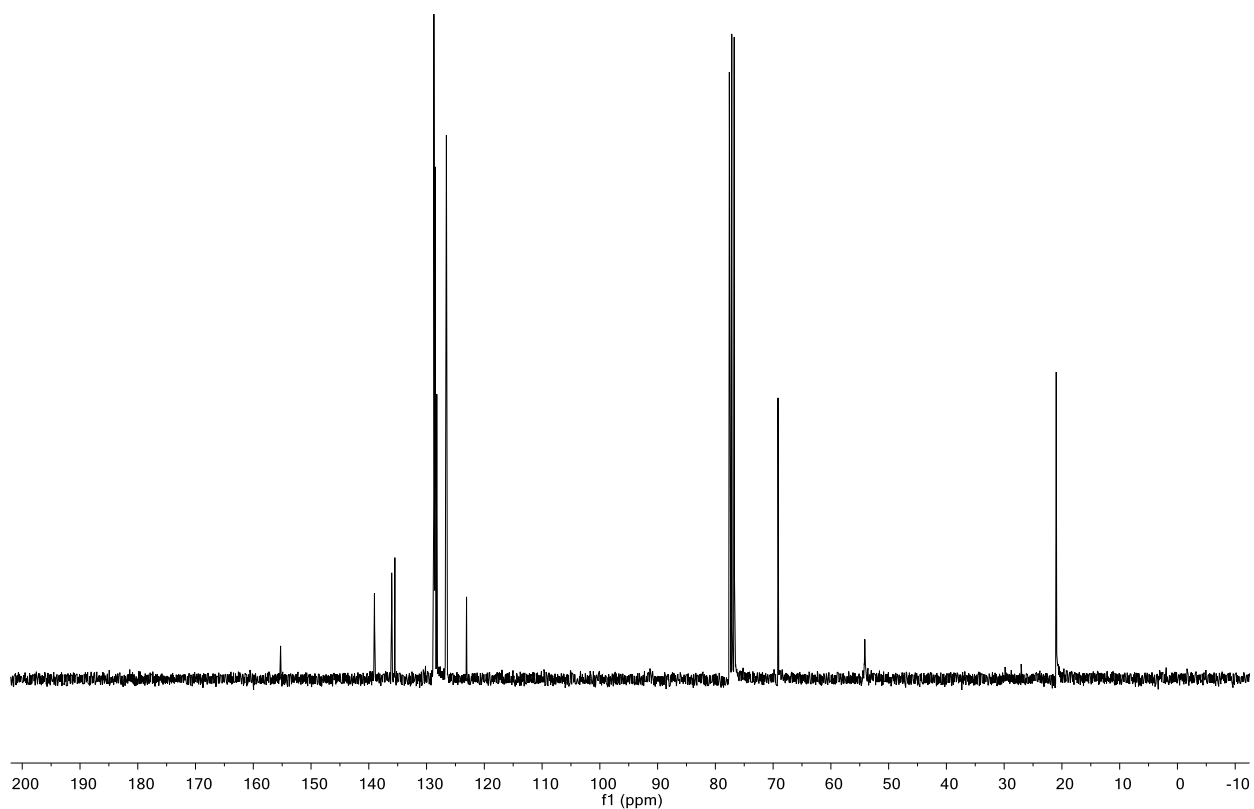

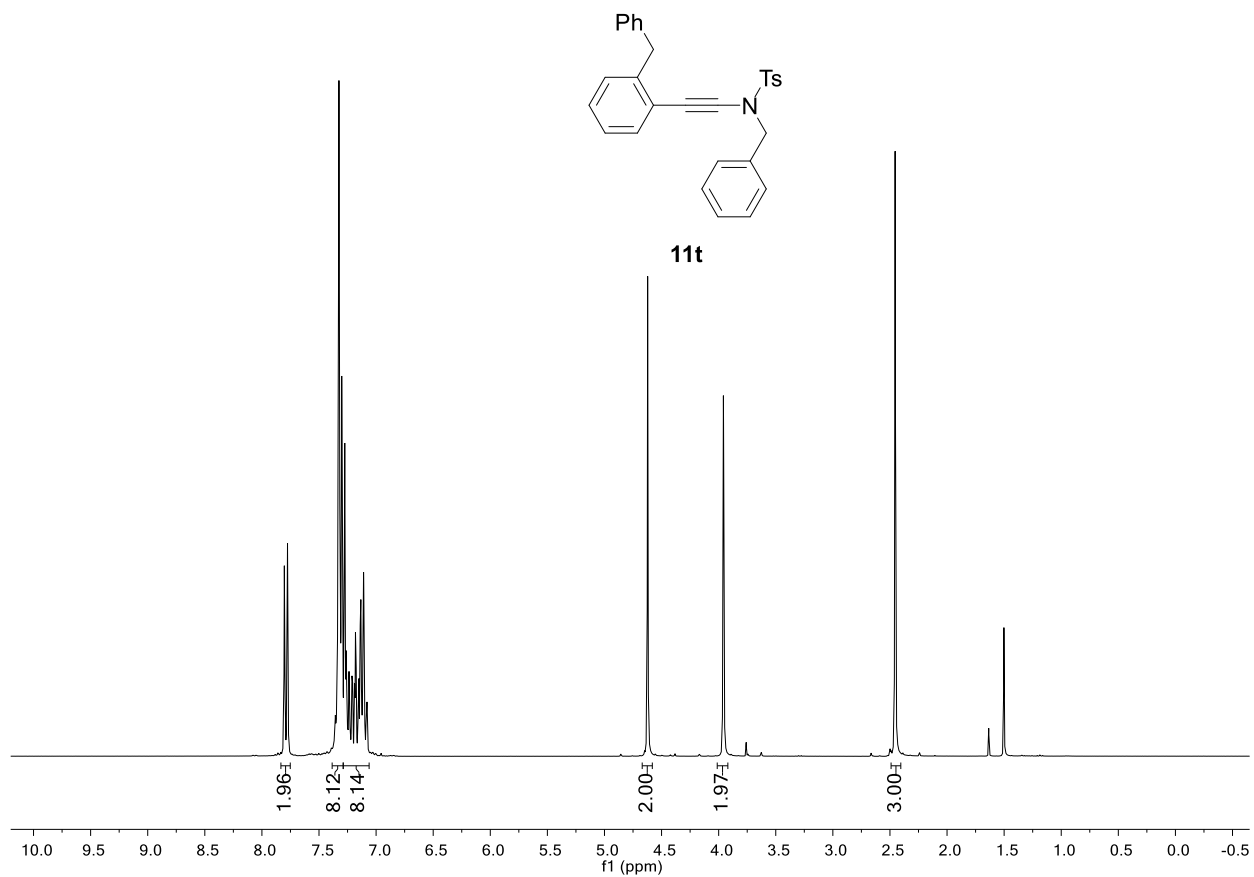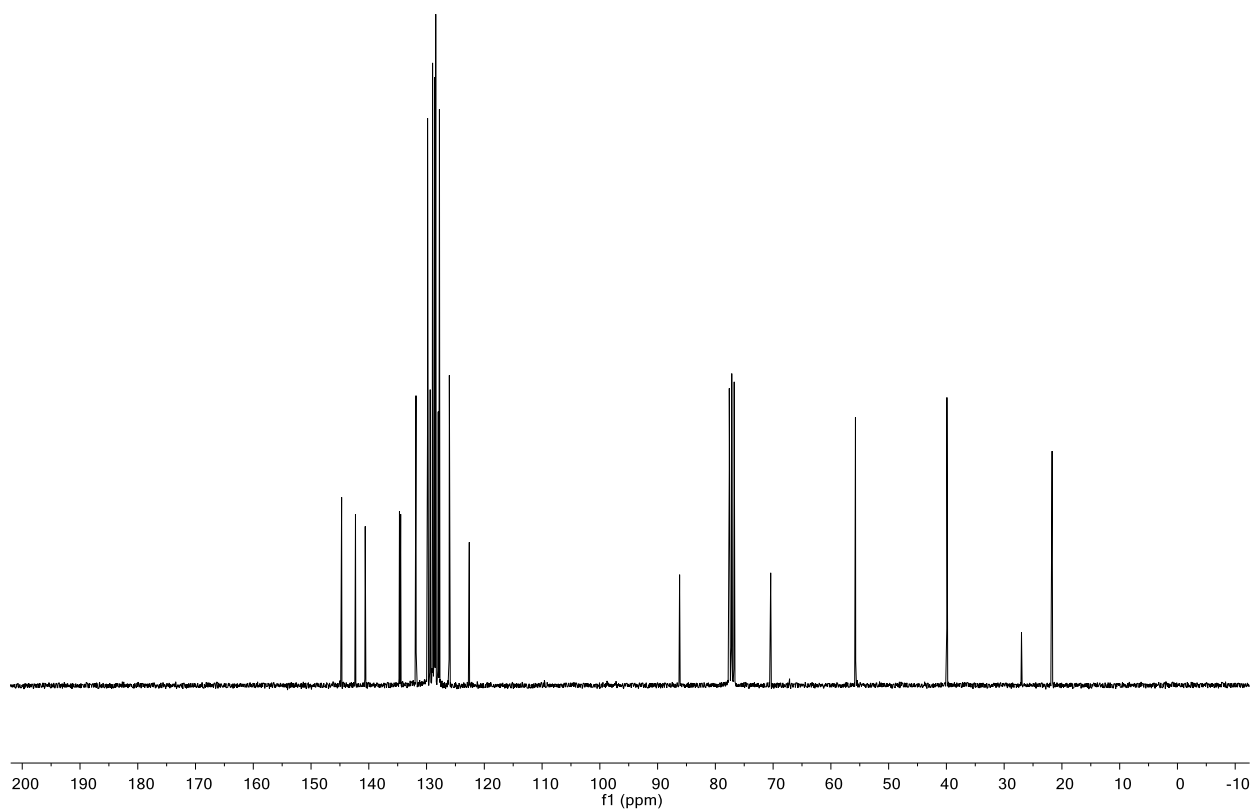

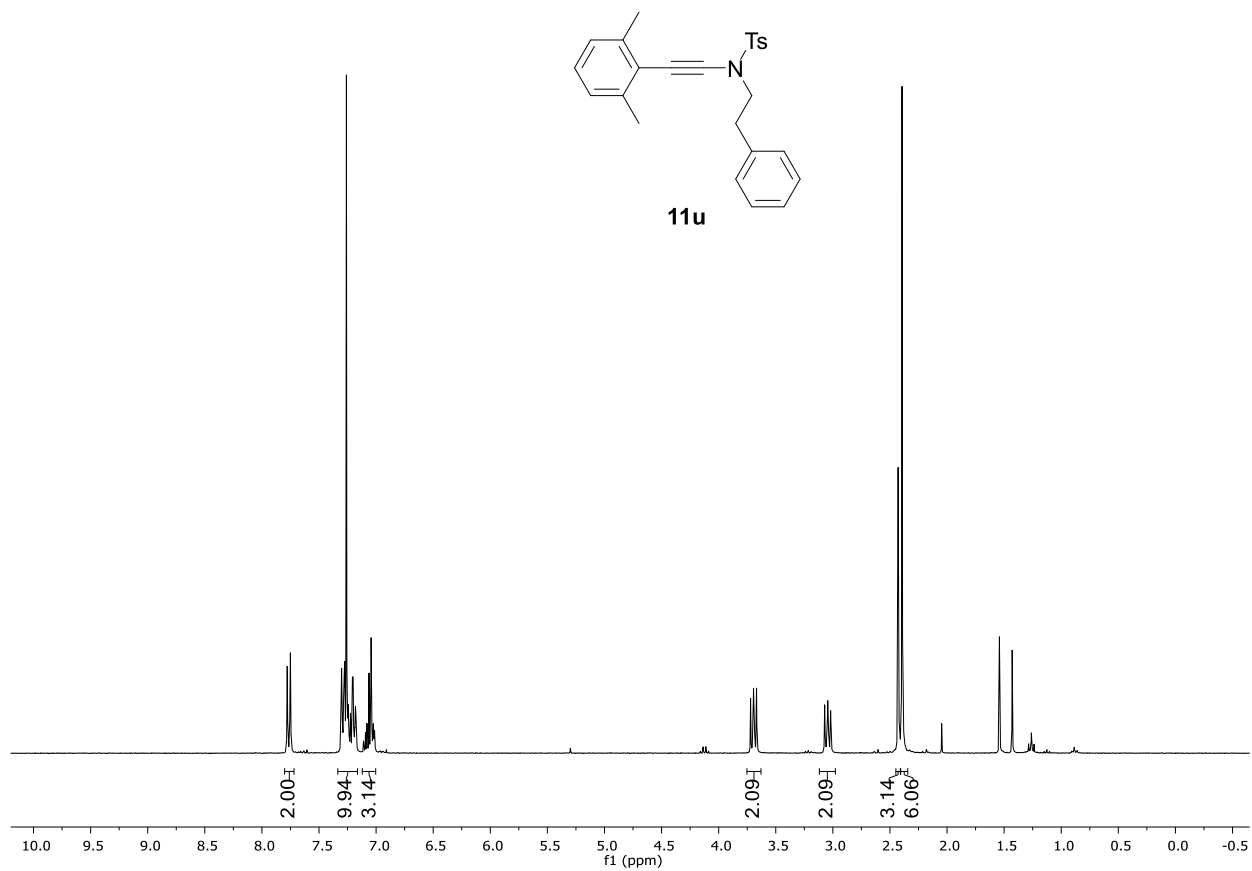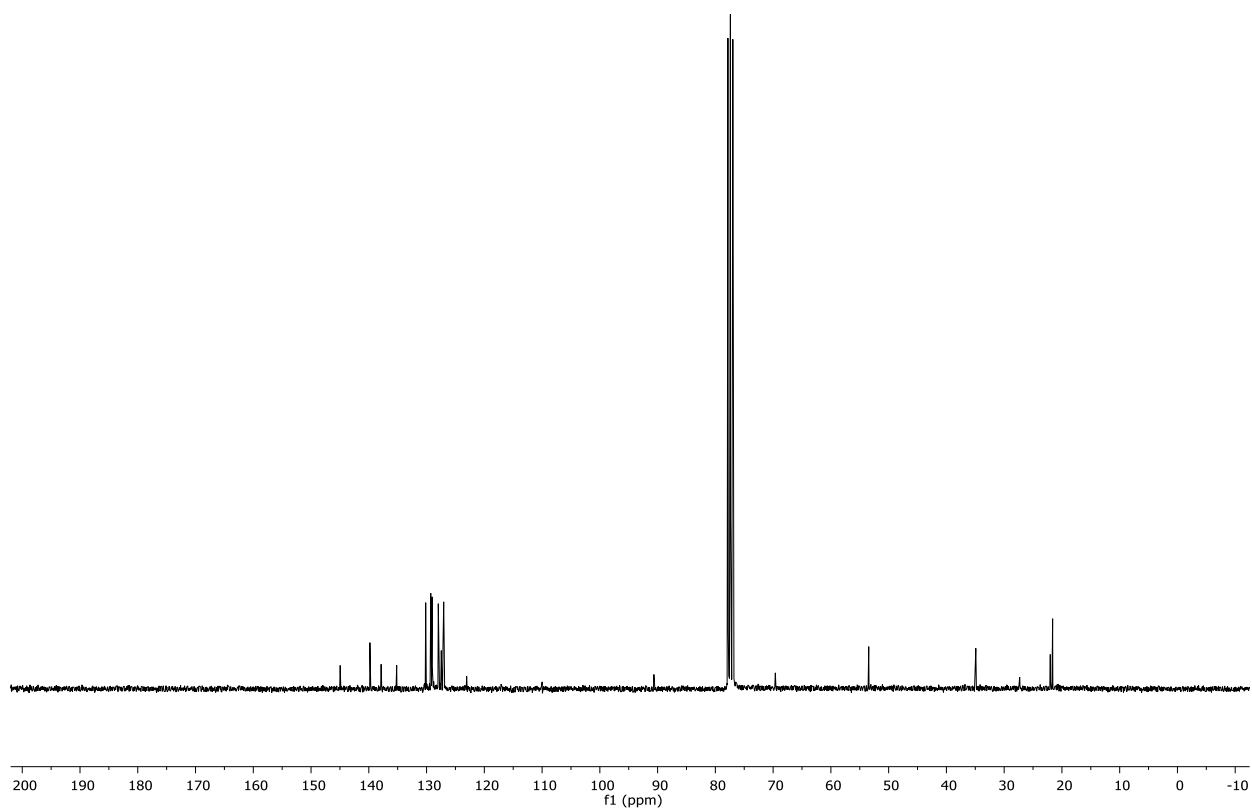

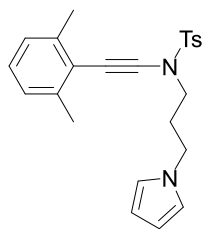

11v

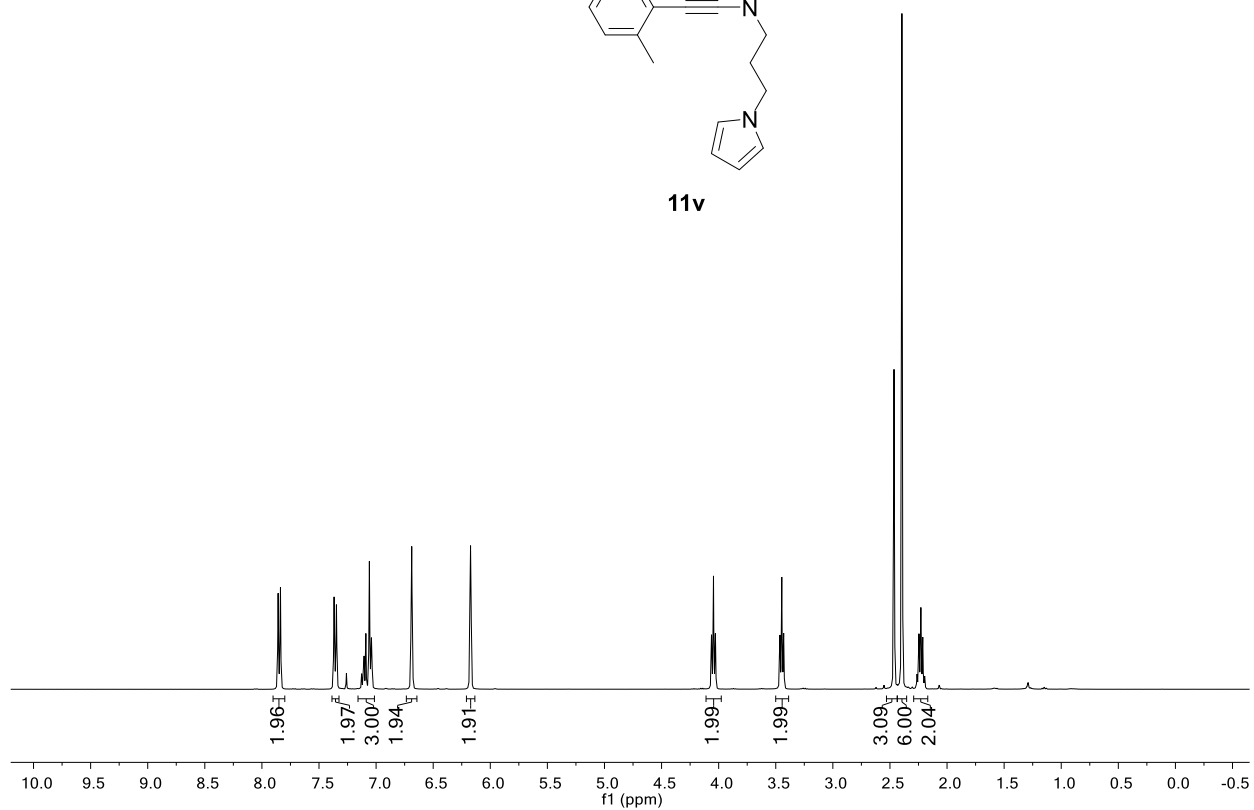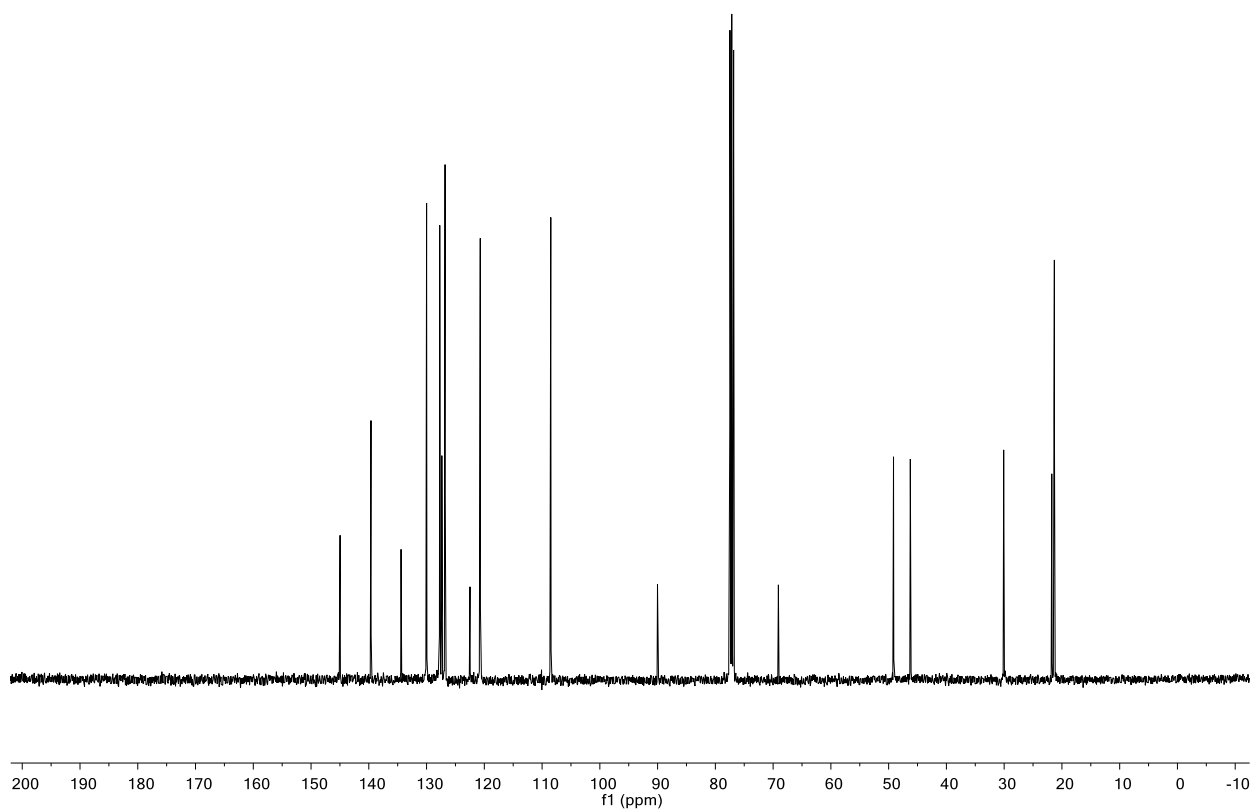

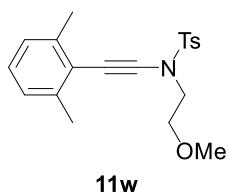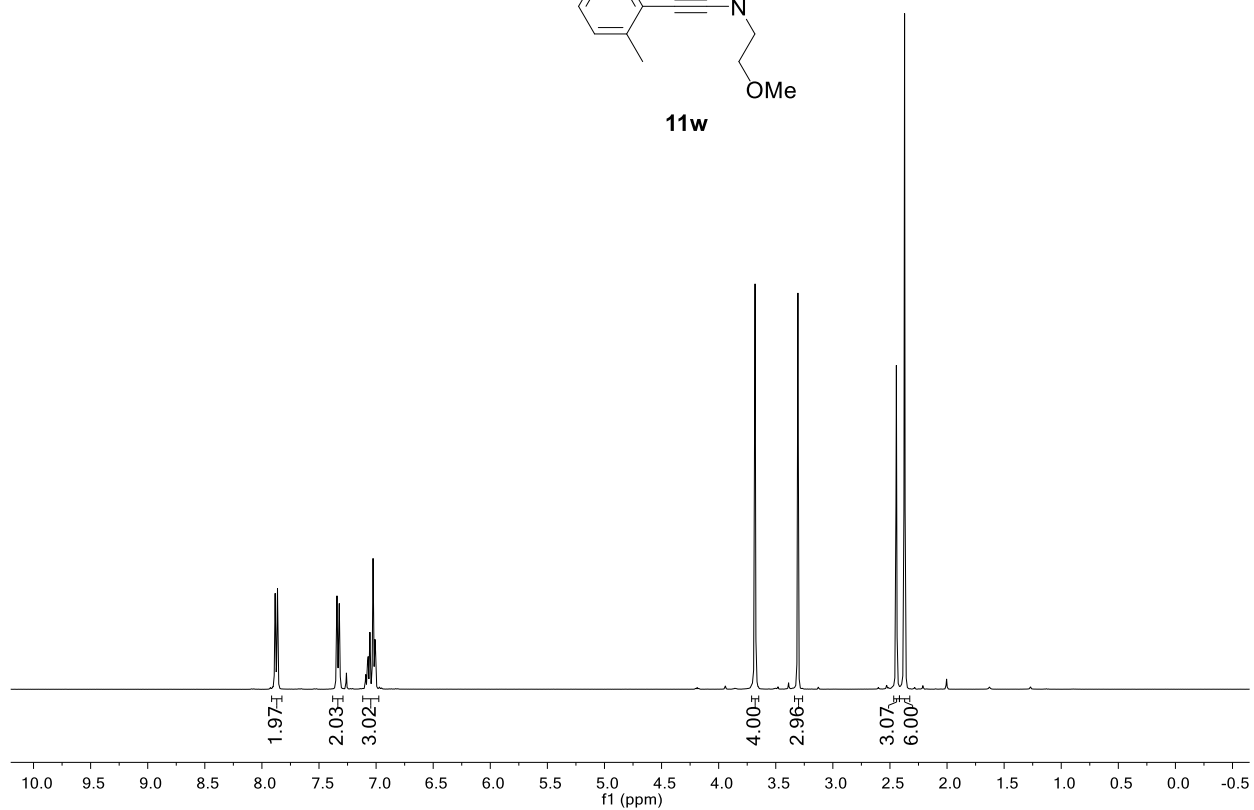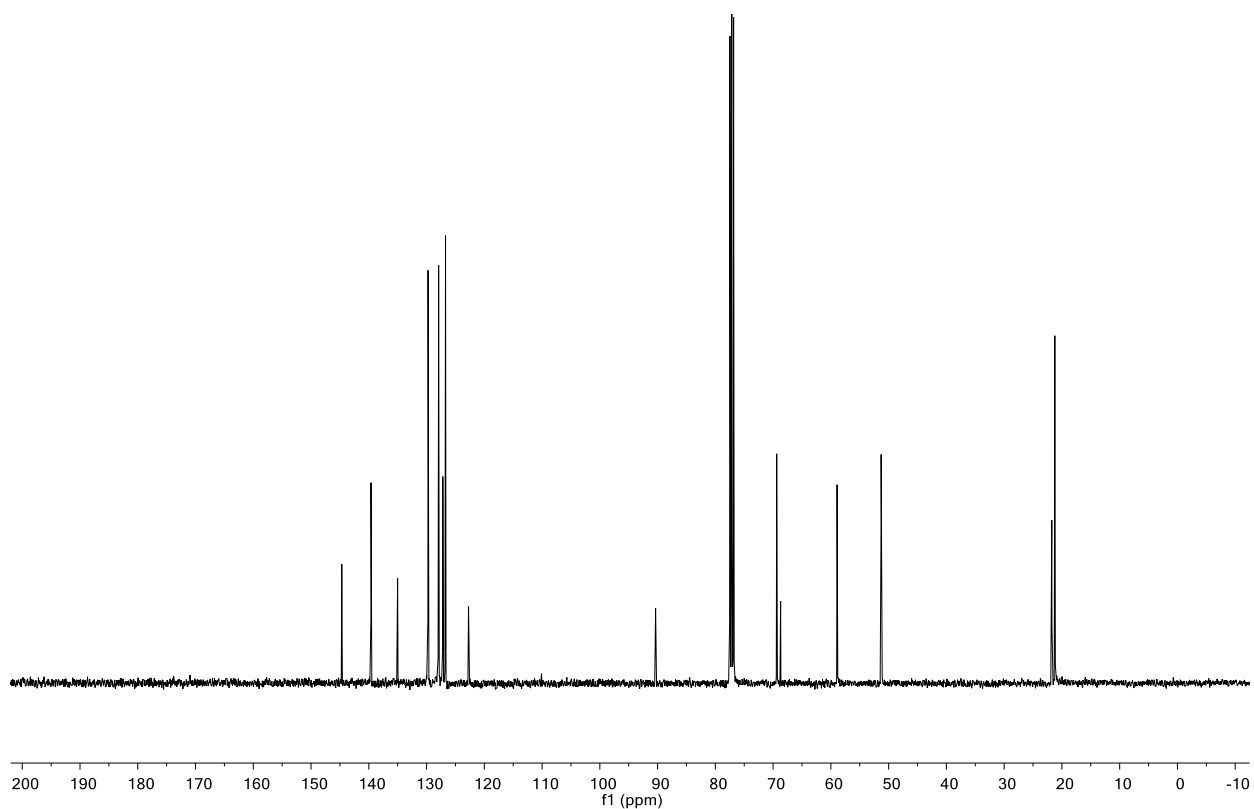

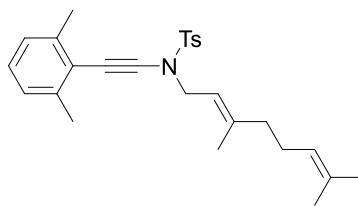

27d

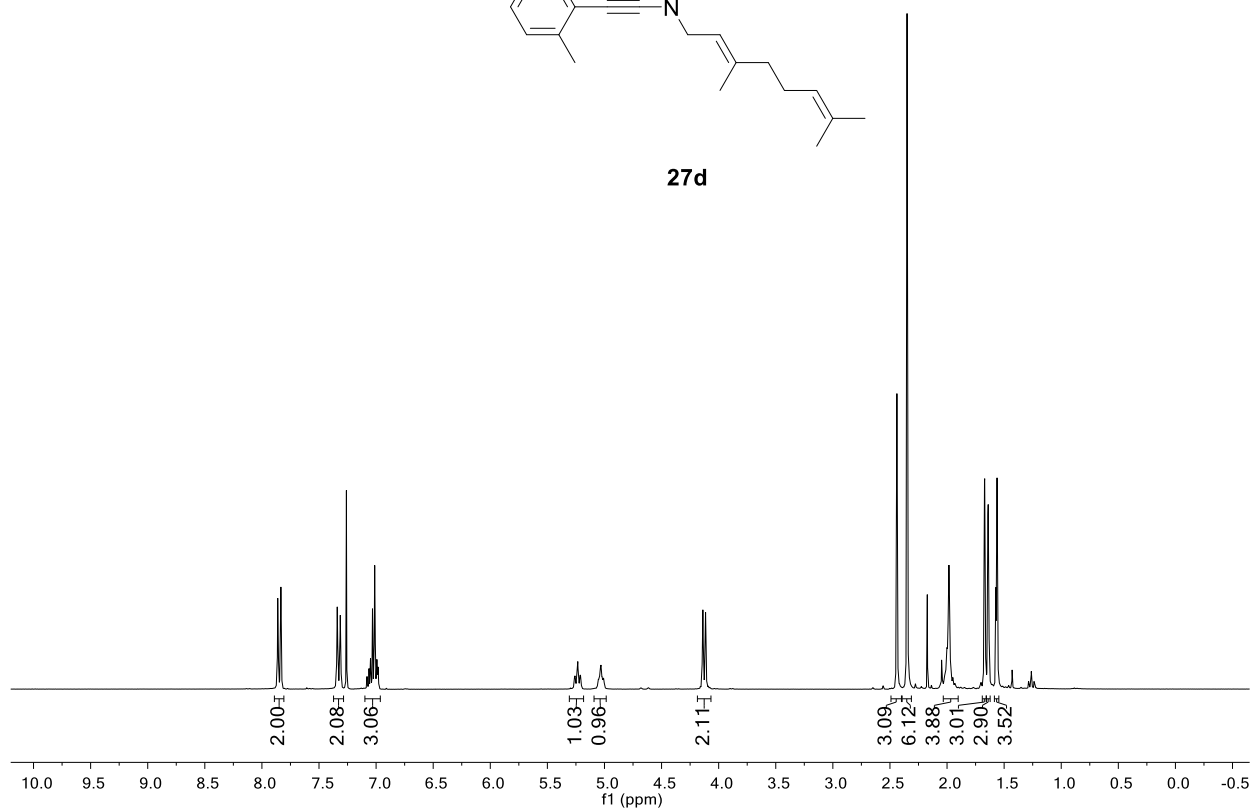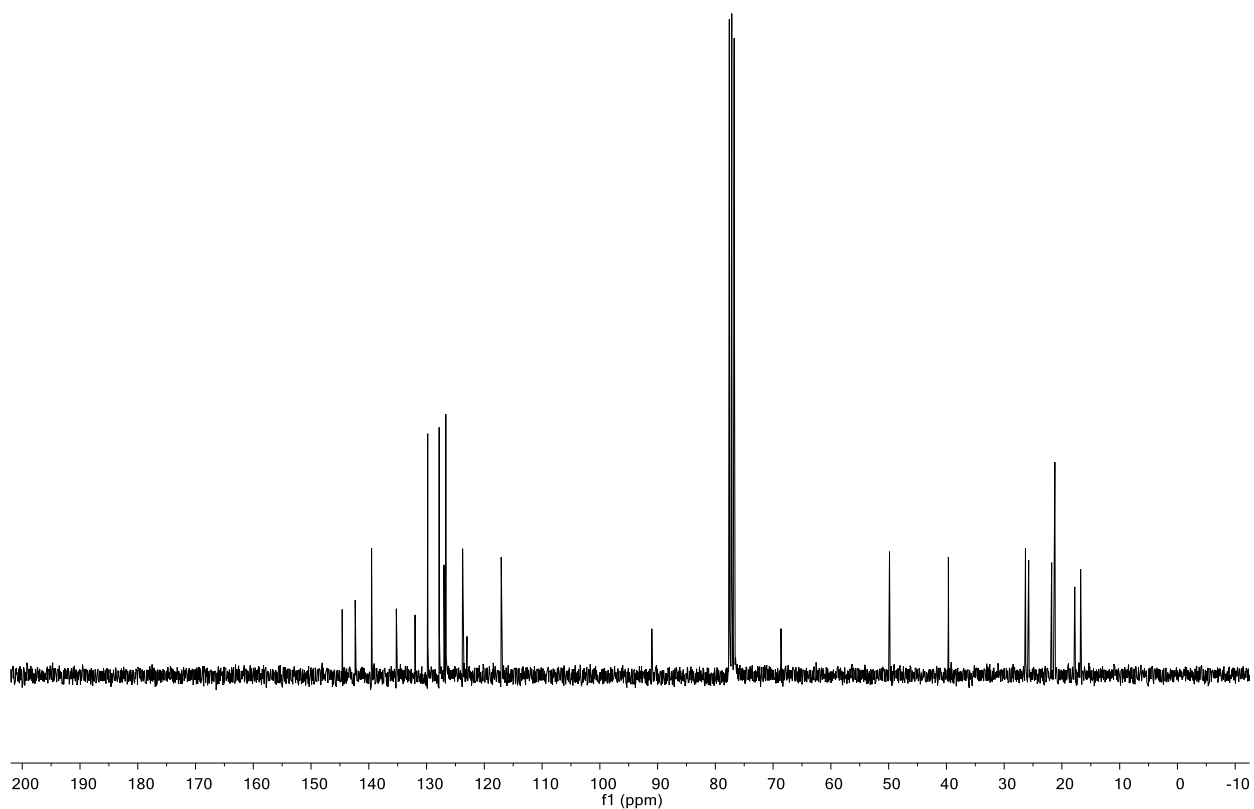

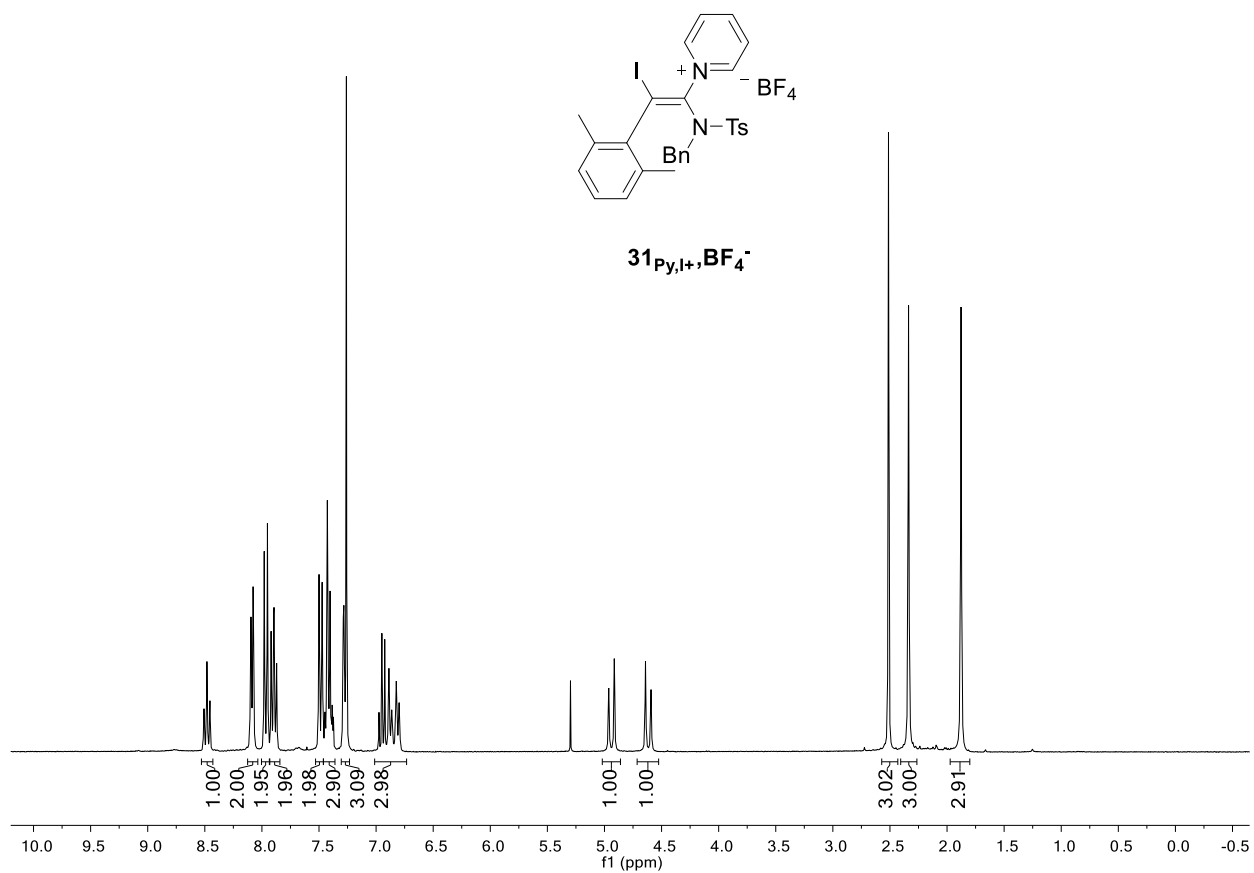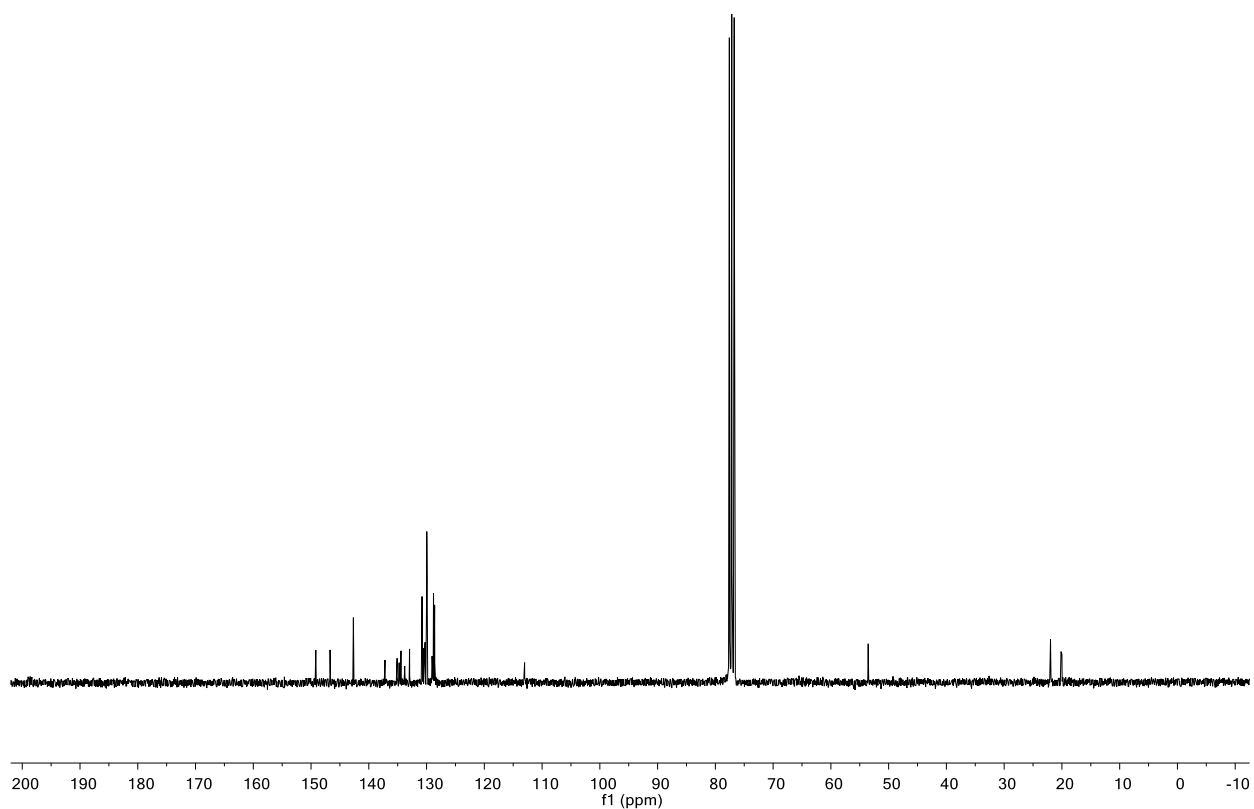

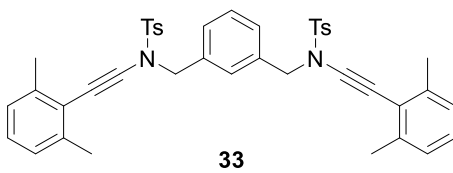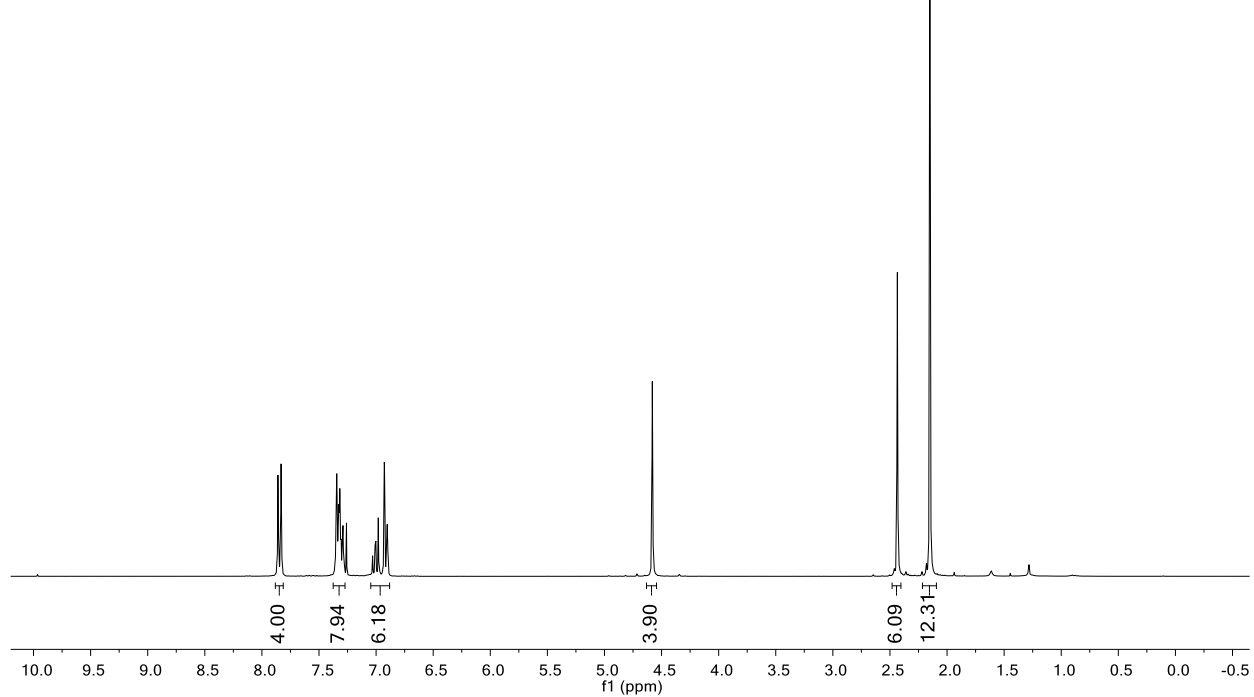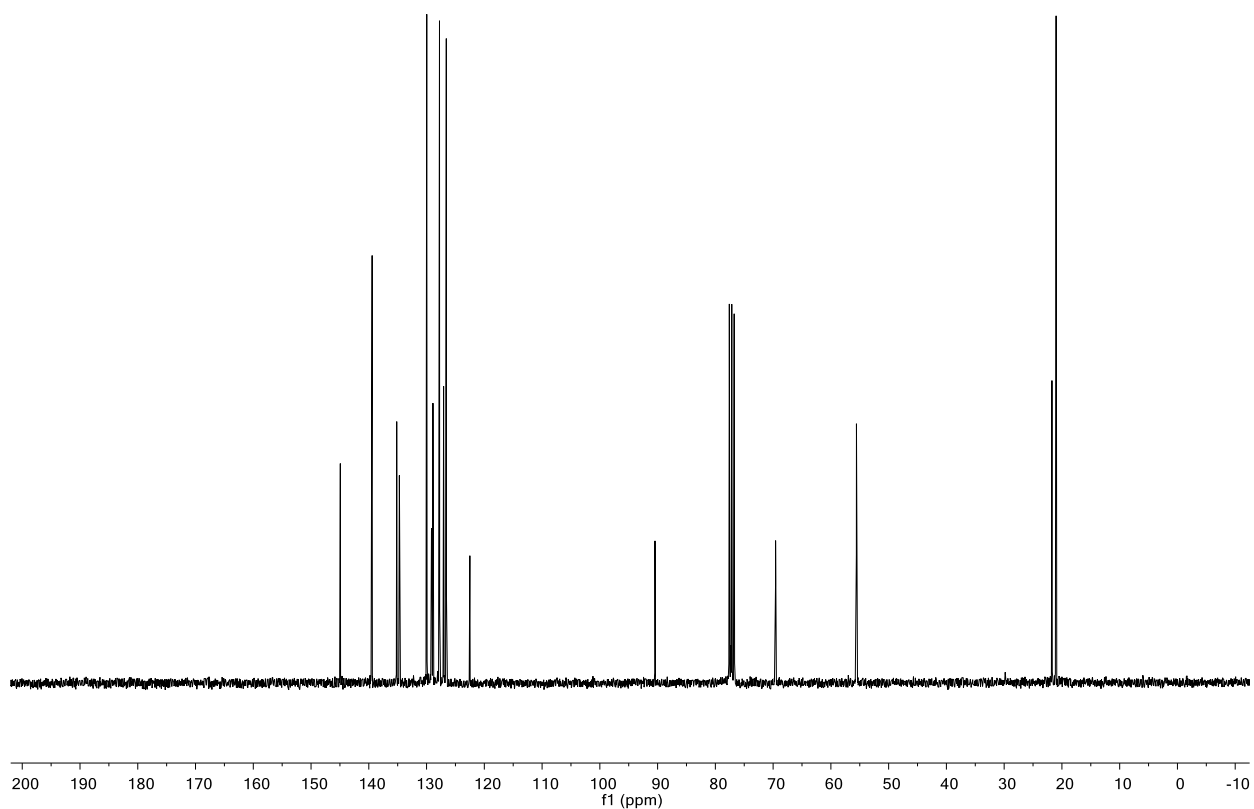



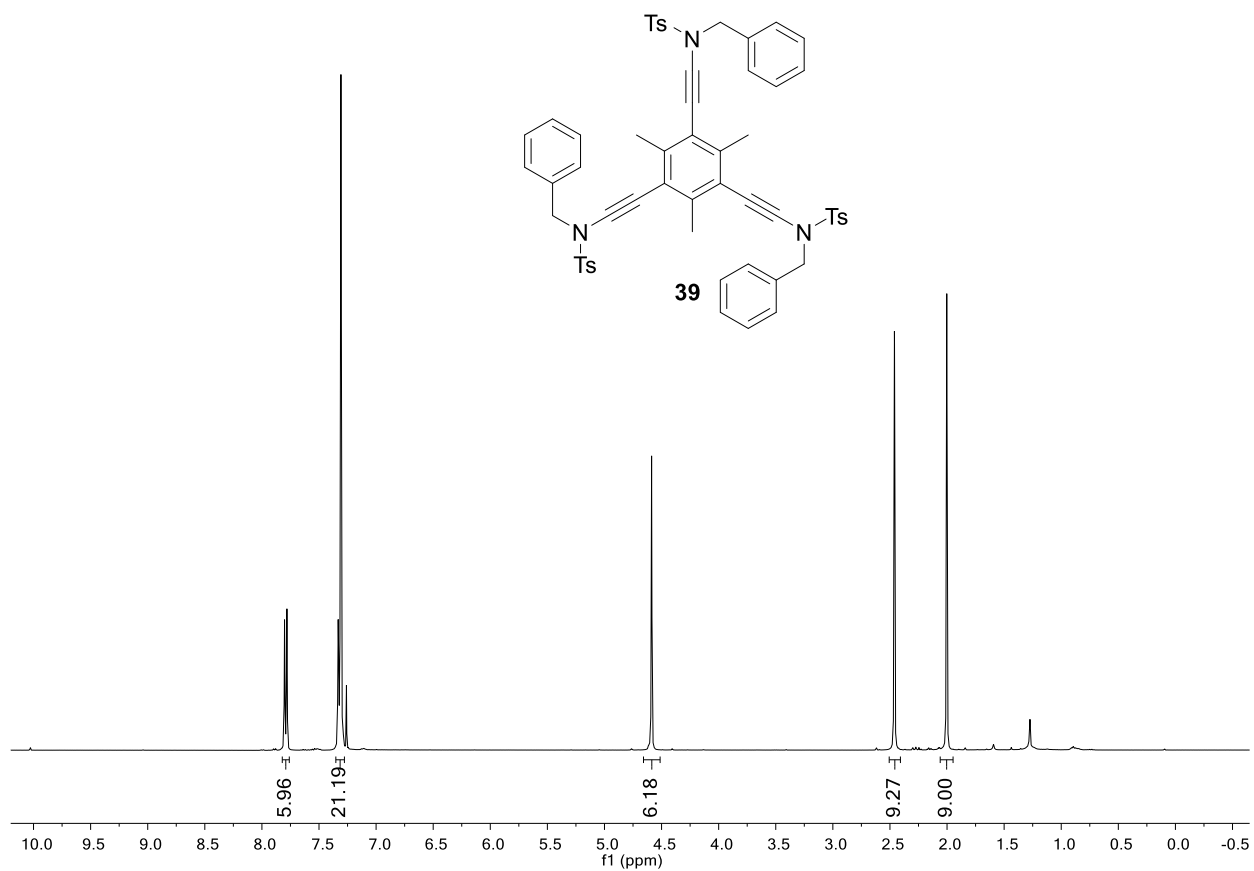

Supplement: c7ob00850c1.pdf [file c7ob00850c1.pdf]
